1 **Fate tracing reveals differences between Reelin<sup>+</sup> HSCs and Desmin<sup>+</sup> HSCs**  
2 **in activation, migration, and proliferation activities**

3 Ning Chen<sup>1</sup>, Shenghui Liu<sup>1</sup>, Dan Qin<sup>1</sup>, Dian Guan<sup>1</sup>, Yaqing Chen<sup>1</sup>, Chenjiao  
4 Hou<sup>1</sup>, Songyun Zheng<sup>2</sup>, Liqiang Wang<sup>3</sup>, Xiangmei Chen<sup>3</sup> and Lisheng Zhang<sup>1\*</sup>

5 1. Bio-medical Center/College of Veterinary Medicine, Huazhong Agricultural  
6 University, Wuhan, Hu Bei, 430070, China

7 2. College of Life Science and Technology, Huazhong Agricultural University,  
8 Wuhan, 430070, China

9 3. Department of Nephrology, Chinese PLA General Hospital, Chinese PLA  
10 Institute of Nephrology, State Key Laboratory of Kidney Diseases, National  
11 Clinical Research Center for Kidney Diseases, 28th Fuxing Road, Beijing,  
12 100853, China

13 **\*Corresponding author:**

14 Lisheng Zhang, PhD, Bio-medical Center/College of Veterinary Medicine,  
15 Huazhong Agricultural University, Wuhan, Hubei, 430070, China

16 Tel/fax: +862787282091.

17 E-mail address: [lishengzhang@mail.hzau.edu.cn](mailto:lishengzhang@mail.hzau.edu.cn)

18

19

20

21

22 **Abstract**

23 The activation of hepatic stellate cells (HSCs) which comprise distinct clusters,  
24 is the main cause of liver fibrogenesis in response to different etiologies of  
25 chronic liver injuries. In this study, we constructed a novel ReelinCreERT2  
26 transgenic mouse in which cells expressing Reelin were fully marked and  
27 demonstrated that about 50% HSCs were labeled. These ReelinCreERT2-  
28 labeled HSCs displayed distinct characteristics in migration, activation and  
29 proliferation compared to Desmin<sup>+</sup> HSCs (total HSCs) in cholestatic (bile duct  
30 ligation; BDL) or hepatotoxic (carbon tetrachloride; CCl<sub>4</sub>) liver injuries. In BDL-  
31 induced fibrotic livers, Desmin<sup>+</sup> HSCs were activated with increased  
32 proliferation and accumulation activities around the portal triad, but mGFP<sup>+</sup>  
33 HSCs did not show proliferation or accumulation activity around the portal triad,  
34 and only a small part was activated. In CCl<sub>4</sub>-induced fibrotic livers, most of  
35 Desmin<sup>+</sup> and mGFP<sup>+</sup> HSCs were activated along with proliferation and  
36 accumulation potential around the central vein, however fewer mGFP<sup>+</sup> HSCs  
37 were activated compared to Desmin<sup>+</sup> HSCs. Moreover, in the regression of  
38 CCl<sub>4</sub>-induced fibrosis, mGFP<sup>+</sup> HSCs were apoptosed whereas Desmin<sup>+</sup> HSCs  
39 recovered to normal state. Besides, we didn't find evidence that mGFP<sup>+</sup> HSCs  
40 transdifferentiated into hepatocytes or cholangiocytes through mesenchymal-  
41 epithelial transition (MET).

42 **Keywords:** Reelin, lineage-tracing, HSCs, activation, accumulation, apoptosis

43

## 44 **Introduction**

45 Reelin, a secreted extracellular glycoprotein with a molecular weight of 420 kDa,  
46 owns two cell surface receptors, the very low-density lipoprotein receptor and  
47 the apolipoprotein E receptor (1-3). In vivo and vitro studies show that Reelin is  
48 expressed in hepatocytes and up-regulated in patients with liver cirrhosis in the  
49 liver and plasma(2, 4). However, some studies reveal that Reelin is expressed  
50 both in hepatocytes and hepatic stellate cells (HSCs)(5, 6). Others demonstrate  
51 that Reelin is expressed only in HSCs, but not in hepatocytes(7, 8).  
52 Besides these, studies show that Reelin is detected in hepatoblasts and oval  
53 cells, which differentiate into hepatocytes and cholangiocytes following liver  
54 damage(9). Thus, there exists a huge debate over Reelin localization in liver  
55 cells and few detailed functions of Reelin in livers have been investigated.

56 HSCs belonging to mesenchymal cells exhibit fibroblast and pericyte  
57 characteristics, and compose one third of nonparenchymal cells and 15% of  
58 resident cells(10, 11). In normal livers, HSCs laden with retinoid droplets  
59 maintain quiescent state and are located in the sinusoidal space of Disse where  
60 hepatocytes exchange biomolecules with portal blood(12, 13). Following liver  
61 injury, quiescent HSCs are activated and transdifferentiated into migratory,  
62 contractile, and proliferative myofibroblasts (MFs) to secrete extracellular  
63 matrix (ECM)(14, 15). HSC activation leads to fiber scars accumulation in the  
64 space of Disse, which further results in endothelial fenestration loss(12, 16).  
65 Numerous specific markers, such as desmin, lecithin-retinol acyltransferase

66 (LRAT), collagen type I (Col1a1), vimentin, glial fibrillary acidic protein (GFAP),  
67 smooth muscle actin ( $\alpha$ -SMA) and cytoglobin have been used to characterize  
68 HSCs genetic targeting, imaging, histological detection, and cell fate tracing(17).  
69 Genetic cell lineage tracking labeling of MFs with Col1a1, a major component  
70 of the extracellular matrix, has showed that HSCs are the primary source of  
71 MFs, occupying approximately 87% of MFs in carbon tetrachloride (CCl<sub>4</sub>)-  
72 induced liver injury(18). Another study has shown that 82% ~ 96% of MFs are  
73 originated from HSCs labeled with LRAT in mice treated with CCl<sub>4</sub>, 3,5  
74 diethoxycarbonyl-1,4-dihydro-collidin diet or bile duct ligation (BDL)(19). All of  
75 these suggest that HSCs are the major source of MFs and the activation of  
76 HSCs is the main cause of liver fibrogenesis in response to diverse etiologies.  
77 Several studies have reported that mesenchymal-to-epithelial transition (MET)  
78 occurs following liver injury and chronic liver inflammation to reduce fibrosis(20-  
79 22). Studies using GFAPCre and ACTA2CreERT2-marked mice have  
80 demonstrated that HSCs differentiate into hepatocytes and cholangiocytes  
81 through MET in injured livers(23-25). Other studies using LratCre- and  
82 VimentinCreER-labeled mice have documented no HSCs undergo MET during  
83 liver injury(19, 26, 27). So far, whether HSCs undergo MET is still a scientific  
84 question to be addressed. After underlying etiology of liver fibrosis is removed,  
85 fibrosis scars are gradually regressed(10, 13, 15). In the course of this  
86 regression, the activated HSCs undergo apoptosis or revert to a quiescent-like  
87 state(28, 29). The apoptosed and inactivated HSCs in the regression of liver

88 fibrosis may be originate from different subsets(30). Promoting HSC apoptosis  
89 and repressing HSC activation through pharmacological treatment contributes  
90 to liver fibrosis resolution (31). Therefore, facilitating HSC apoptosis and  
91 repressing HSC activation have been viewed as a therapeutic target for liver  
92 fibrosis(32, 33).

93 Although HSCs play a major role in response to various types of liver fibrosis,  
94 the fibrogenic phenotype and mechanisms are different according to the various  
95 kinds of etiologies(34, 35). Therefore, a variety of models, such as BDL and  
96 CCl<sub>4</sub>, are used to mimic hepatopathy of different types to develop better  
97 therapeutic strategies (36). BDL and CCl<sub>4</sub> induced liver injuries are two distinct  
98 liver fibrosis models that mimics cholestasis (such as primary sclerosing  
99 cholangitis and primary biliary cirrhosis) and hepatotoxicity (such as  
100 nonalcoholic steatohepatitis and chronic viral hepatitis) respectively(37, 38).

101 Additionally, single-cell RNA sequencing reveals that HSCs are heterogeneous  
102 and comprised of distinct populations with different gene-expression in normal  
103 and a variety of disease livers and divided into different clusters according to  
104 their distinct characteristics of position and function(30, 39, 40). These findings  
105 indicate that liver fibrosis treatment should suit the remedy to the case based  
106 on fibrogenetic etiologies in different etiologies of liver disease(14).

107 In this study, our genetic cell fate tracking data revealed that ReelinCreERT2-  
108 labeled HSCs displayed different characteristics compared to Desmin<sup>+</sup> HSCs  
109 (total HSCs) in BDL-induced and CCl<sub>4</sub>-induced fibrotic livers.

## 110 **Results**

### 111 **ReelinCreERT2 labels HSCs in sham-operated and BDL-induced fibrotic** 112 **mouse livers.**

113 In order to achieve accurate labelling of Reelin-expressing cells, we constructed  
114 Reelin<sup>CreERT2</sup>; Rosa26mTmG<sup>flox</sup> (R26T/G<sup>f</sup>) mouse model. In this model, after  
115 TAM treatment, tomato sequence was excised by Cre, and membrane-tagged  
116 green fluorescence protein (mGFP) started to be expressed (**Figure 1A**). When  
117 Reelin<sup>CreERT2</sup>; R26T/G<sup>f</sup> mice were injected with TAM, ReelinCreERT2-marked  
118 cells in the livers expressed mGFP (**Figure 1B**). Then, we verified whether  
119 ReelinCreERT2-mediated mGFP expression matched endogenous Reelin  
120 expression in sham-operated and BDL-induced fibrotic mouse livers. Obvious  
121 collagen fiber was accumulated after BDL operation (**Supplemental Figure**  
122 **1A**), and  $\alpha$ -SMA and Col1a1 expression was significantly increased  
123 (**Supplemental Figure 1B**) compared to those in sham-operated livers,  
124 indicating livers developed significant fibrosis following BDL operation.  
125 Immunostaining of mGFP and Reelin in serial section indicated that  
126 ReelinCreERT2-mediated mGFP expression almost fully matched endogenous  
127 Reelin both in sham-operated and BDL-induced fibrotic mouse livers (**Figure**  
128 **1C**). These findings suggest that Reelin<sup>CreERT2</sup>; R26T/G<sup>f</sup> mouse was a credible  
129 model to precisely label cells expressing Reelin. Next, we explored what types  
130 of cells Reelin located in in mouse livers. Immunohistochemistry of the adult  
131 Reelin<sup>CreERT2</sup>; R26T/G<sup>f</sup> mouse livers for mGFP and Desmin showed almost all

132 of mGFP<sup>+</sup> cells were Desmin<sup>+</sup> but some Desmin<sup>+</sup> cells were not mGFP<sup>+</sup> (**Figure**  
133 **1D**), indicating that Reelin was expressed in HSCs and only part of HSCs  
134 expressed Reelin rather than hepatocytes, hepatoblasts or oval cells in sham-  
135 operated and BDL-induced fibrotic mouse livers.

136 **ReelinCreERT2-labeled HSCs do not migrate or accumulate and only a**  
137 **small fraction is activated in BDL-induced fibrotic livers.**

138 As Reelin was expressed only in part of HSCs by immunostaining of mGFP and  
139 Desmin, we investigated whether there were differences between Desmin<sup>+</sup>  
140 HSCs and mGFP<sup>+</sup> HSCs. Immunohistochemistry of mGFP and Desmin with  
141 Glutamine Synthetase (GS, a marker of central vein) showed that both mGFP<sup>+</sup>  
142 and Desmin<sup>+</sup> HSCs were scattered throughout the parenchyma in sham-  
143 operated livers (**Figure 2A**). Whereas in BDL-induced fibrotic livers, Desmin<sup>+</sup>  
144 HSCs were accumulated around the portal triad, and mGFP<sup>+</sup> HSCs were  
145 scattered throughout the parenchyma (**Figure 2B**). These findings suggest  
146 significant differences exist in migration capacity and location between Desmin<sup>+</sup>  
147 and mGFP<sup>+</sup> HSCs in BDL-induced liver fibrosis. Next, we explored activation  
148 ability of mGFP<sup>+</sup> HSCs. Immunostaining of mGFP with  $\alpha$ -SMA showed that  
149 mGFP<sup>+</sup> HSCs did not express  $\alpha$ -SMA in sham-operated livers, however,  $\alpha$ -  
150 SMA was expressed in mGFP<sup>+</sup> HSCs in BDL-induced fibrotic livers (**Figure 2C**),  
151 which indicated that mGFP<sup>+</sup> HSCs were activated in fibrotic livers induced by  
152 BDL. Immunostaining of  $\alpha$ -SMA with Desmin and mGFP in serial sections  
153 showed that a large proportion of Desmin<sup>+</sup> HSCs (72.35% Desmin<sup>+</sup> HSCs)

154 expressed  $\alpha$ -SMA, but only 31.01% mGFP<sup>+</sup> HSCs expressed  $\alpha$ -SMA in BDL-  
155 induced fibrotic livers (**Figure 2D**). To confirm the finding that fewer mGFP<sup>+</sup>  
156 HSCs were activated than Desmin<sup>+</sup> HSCs, we analyzed serial sections  
157 immunostaining of Col1a1 with mGFP or Desmin, and got similar results as  
158 shown in **Figure 2E** that Col1a1 was expressed in 48.53% mGFP<sup>+</sup> HSCs while  
159 expressed in 89.34% Desmin<sup>+</sup> HSCs.

160 **ReelinCreERT2-labeled HSCs do not show distinguished proliferation**  
161 **activity in BDL-induced fibrotic livers.**

162 The migration, proliferation and activation of HSCs are an accompanying  
163 process(10, 12). There were significant differences in migration and activation  
164 activities between mGFP<sup>+</sup> and Desmin<sup>+</sup> HSCs, so we want to know the  
165 proliferative capacity difference between mGFP<sup>+</sup> and Desmin<sup>+</sup> HSCs.  
166 Immunohistochemical staining of Desmin and mGFP showed the number of  
167 Desmin<sup>+</sup> HSCs increased remarkably in BDL-induced fibrotic livers compared  
168 to sham-operated livers (**Figure 3A**), but the number of mGFP<sup>+</sup> HSCs were  
169 comparable (**Figure 3B**). Co-staining of mGFP and Desmin showed the  
170 percentage of mGFP<sup>+</sup> HSCs accounted for Desmin<sup>+</sup> HSCs was 49.83% in  
171 sham-operated livers but decreased to 23.84% in BDL-induced fibrotic livers  
172 (**Figure 3C**), which further confirmed that the number of Desmin<sup>+</sup> HSCs  
173 increased remarkably but the number of mGFP<sup>+</sup> HSCs had no significant  
174 difference in BDL-induced fibrotic livers. Bromodeoxyuridine (BrdU) labeling  
175 showed the percentage of Desmin<sup>+</sup> HSCs with BrdU was 4.74% in sham-



176 operated livers and increased to 9.58% in BDL-induced livers, but the  
177 percentage of mGFP<sup>+</sup> HSCs labeled by BrdU did not change much (4.34% in  
178 sham-operated livers and 3.31% in BDL-induced livers) (**Figure 3D**).  
179 Immunostaining of Ki67 and mGFP or Desmin got a similar result that the  
180 proliferation ratio of Desmin<sup>+</sup> HSCs increased greatly (6.57% in sham-operated  
181 livers and increased to 10.59% in BDL-induced fibrotic livers), but the ratio of  
182 mGFP<sup>+</sup> HSCs had no notable difference (5.84% in sham-operated livers and  
183 5.33% in BDL-induced fibrotic livers) (**Figure 3E**). Considering the factors, such  
184 as changes of cell number, proliferation rate, and the percentage of mGFP<sup>+</sup>  
185 HSCs accounted for Desmin<sup>+</sup> HSCs in normal and BDL-induced fibrotic livers,  
186 we conclude that the number of Desmin<sup>+</sup> HSCs increased greatly, but the  
187 proliferative ratio of mGFP<sup>+</sup> HSCs in BDL-induced fibrotic livers was not  
188 remarkably different from sham-operated livers.

### 189 **mGFP<sup>+</sup> HSCs accumulate around central vein in CCl<sub>4</sub>-induced liver injury.**

190 BDL initially induced biliary duct hyperplasia and further caused biliary fibrosis,  
191 however, CCl<sub>4</sub>-induced liver fibrosis started on pericentral cell injury and formed  
192 fibrous septum (**Supplemental Figure 1C**). For this reason, we explored  
193 whether there were differences in migration, activation and proliferation  
194 potentials between mGFP<sup>+</sup> HSCs and Desmin<sup>+</sup> HSCs in CCl<sub>4</sub>-induced liver  
195 injury. After treated with CCl<sub>4</sub> for 6 weeks, obvious collagen fiber was observed  
196 by Sirius red staining (**Supplemental Figure 2A**) and immunostaining showed  
197 that the expression of  $\alpha$ -SMA and Col1a1 was significantly increased.

198 **(Supplemental Figure 2B)**, which indicated that Reelin<sup>CreERT2</sup>; R26T/G<sup>f</sup> mice  
199 developed severe fibrosis. Serial section immunohistochemistry of Reelin and  
200 mGFP in normal and CCl<sub>4</sub>-induced fibrotic livers of TAM-treated Reelin<sup>CreERT2</sup>;  
201 R26T/G<sup>f</sup> mice showed mGFP expression almost fully matched endogenous  
202 Reelin, which was similar to immunohistochemistry staining of Reelin and  
203 mGFP in sham-operated and BDL-induced fibrotic livers **(Figure 4A)**.  
204 Immunohistochemistry for mGFP with Desmin and  $\alpha$ -SMA also showed mGFP  
205 was expressed in HSCs in normal and CCl<sub>4</sub>-induced fibrotic livers **(Figure 4B)**  
206 and mGFP<sup>+</sup> HSCs were activated in CCl<sub>4</sub>-induced fibrotic livers **(Figure 4C)**.  
207 Besides, we observed that mGFP<sup>+</sup> and Desmin<sup>+</sup> HSCs were scattered  
208 throughout the parenchyma in normal livers **(Figure 4D)**, but both of them were  
209 accumulated around the central vein in CCl<sub>4</sub>-induced fibrotic livers **(Figure 4E)**.  
210 These findings indicate that the migration activity of Reelin<sup>+</sup> HSCs in CCl<sub>4</sub>-  
211 induced fibrotic livers was significantly different with that in BDL-induced fibrotic  
212 livers.

213 **mGFP<sup>+</sup> HSCs share similarity with Desmin<sup>+</sup> HSCs in proliferation but**  
214 **fewer cells are activated compared to Desmin<sup>+</sup> HSCs in CCl<sub>4</sub>-induced**  
215 **fibrotic livers.**

216 Next, we explored mGFP<sup>+</sup> HSC's activation and proliferation properties in CCl<sub>4</sub>-  
217 induced fibrotic livers. In CCl<sub>4</sub>-induced fibrotic livers of Reelin<sup>CreERT2</sup>;  
218 R26T/G<sup>f</sup> mice, the Immunohistochemistry results showed that 60.43% mGFP<sup>+</sup>  
219 HSCs expressed  $\alpha$ -SMA and the proportion of Desmin<sup>+</sup> HSCs expressed  $\alpha$ -

220 SMA was 80.37% (**Figure 5A**). Meanwhile, 75.38% mGFP<sup>+</sup> HSCs and 85.42%  
221 Desmin<sup>+</sup> HSCs expressed Col1a1 (**Figure 5B**). The above results indicated that  
222 fewer mGFP<sup>+</sup> HSCs were activated than Desmin<sup>+</sup> HSCs in CCl<sub>4</sub>-induced fibrotic  
223 livers. And immunostaining of Desmin and mGFP showed that the number of  
224 Desmin<sup>+</sup> HSCs and mGFP<sup>+</sup> HSCs was increased greatly in CCl<sub>4</sub>-treated fibrotic  
225 livers (**Figure 5C and D**). However, co-staining of mGFP and Desmin revealed  
226 that the percentage of mGFP<sup>+</sup> HSCs accounted for Desmin<sup>+</sup> HSCs had no  
227 significant difference in CCl<sub>4</sub>-treated fibrotic livers compared to that in normal  
228 livers (**Figure 5E**), which indicated there was no significant difference between  
229 Desmin<sup>+</sup> and mGFP<sup>+</sup> HSCs in regarding to proliferative property. So, we further  
230 investigated the proliferative property of mGFP<sup>+</sup> HSCs and Desmin<sup>+</sup> HSCs by  
231 BrdU labeling and Ki67 staining in normal and CCl<sub>4</sub>-treated livers. Our results  
232 documented that Desmin<sup>+</sup> and mGFP<sup>+</sup> HSCs had superior proliferation ability  
233 in CCl<sub>4</sub>-treated livers compared to normal livers, but the proliferation rate was  
234 comparable between Desmin<sup>+</sup> and mGFP<sup>+</sup> HSCs (**Figure 5F and G**). Based on  
235 the immunohistochemistry staining for mGFP and Desmin with  $\alpha$ -SMA, Col1a1,  
236 BrdU and Ki67, we conclude that, in CCl<sub>4</sub>-induced injured livers, mGFP<sup>+</sup> HSCs  
237 shared similarities with Desmin<sup>+</sup> HSCs in proliferation property but still fewer  
238 mGFP<sup>+</sup> HSCs were activated compared to Desmin<sup>+</sup> HSCs.

239 **ReelinCreERT2-labeled HSCs do not transdifferentiate into hepatocytes**  
240 **or cholangiocytes in healthy or injured livers.**

241 HSCs transdifferentiating into hepatocytes or cholangiocytes in injured livers is  
242 controversial(21, 27, 41). To verify whether HSCs are able to transdifferentiate  
243 into hepatocytes and cholangiocytes, we tested ReelinCreERT2-labeled HSCs  
244 transformation in sham-operated and BDL-induced fibrotic livers. However,  
245 analyzed immunohistochemistry for mGFP with hepatocyte nuclear factor 4  
246 alpha (HNF4 $\alpha$ ) showed no mGFP<sup>+</sup> HSCs were observed with typical  
247 hepatocyte nuclear morphology or expressed HNF4 $\alpha$  both in sham-operated  
248 and BDL-induced fibrotic livers (**Figure 6A**). Moreover, immunostaining of  
249 mGFP with cytokeratin 19 (CK19) observed no mGFP<sup>+</sup> HSCs expressed CK19  
250 either (**Figure6B**). Although we did not observe ReelinCreERT2-labeled HSCs  
251 transdifferentiated into hepatocytes or cholangiocytes in BDL-induced fibrotic  
252 livers, in consideration of the different mechanism between BDL-induced and  
253 CCl<sub>4</sub>-induced liver fibrosis, we tested whether ReelinCreERT2-labeled HSCs  
254 transdifferentiate into hepatocytes or cholangiocytes through MET in CCl<sub>4</sub>-  
255 induced fibrotic livers. Immunostaining of mGFP with HNF4 $\alpha$  or CK19 in normal,  
256 CCl<sub>4</sub>-treated, CCl<sub>4</sub>-treated following 7 days recovery or CCl<sub>4</sub>-treated following 3  
257 weeks recovery livers showed no mGFP<sup>+</sup> HSCs expressed HNF4 $\alpha$  or CK19  
258 (**Figure 6C and 6D**). Collectively, these findings exclude the possibility that  
259 ReelinCreERT2-marked HSCs transdifferentiated into hepatocytes or  
260 cholangiocytes through MET in healthy or injured livers.

261 **ReelinCreERT2-labeled HSCs undergo apoptosis in CCl<sub>4</sub>-induced liver**  
262 **fibrosis regression.**

263 We further investigated mGFP<sup>+</sup> HSC's cell fate in livers recovered from CCl<sub>4</sub>-  
264 induced injury. Sirius red staining showed collagen fiber deposited obviously in  
265 CCl<sub>4</sub>-treated livers and regressed markedly in livers recovered from CCl<sub>4</sub>-  
266 induced injury (**Supplemental Figure 2C**). Immunostaining of Desmin and  
267 mGFP showed, in CCl<sub>4</sub>-induced fibrotic livers, Desmin<sup>+</sup> and mGFP<sup>+</sup> HSCs  
268 proliferated notably and after 5 week's recovery from CCl<sub>4</sub>-induced injury the  
269 number of Desmin<sup>+</sup> HSCs returned to normal, whereas few mGFP<sup>+</sup> HSCs were  
270 left (**Figure 7A and B**). The percentage of mGFP<sup>+</sup> HSCs accounted for  
271 Desmin<sup>+</sup> HSCs was 48.08% in normal livers and 50.49% in CCl<sub>4</sub>-induced  
272 fibrotic livers, but decreased to 5.60% in livers recovered from CCl<sub>4</sub>-induced  
273 injury for 5 weeks (**Figure 7C**). Early study reported that HSCs underwent  
274 apoptosis in livers 7 days after CCl<sub>4</sub> cessation. We speculated the disappeared  
275 mGFP<sup>+</sup> HSCs were due to apoptosis, and our immunohistochemical results  
276 approved that mGFP<sup>+</sup> HSCs underwent apoptosis in livers recovered from  
277 CCl<sub>4</sub>-induced injury for 7 days (**Figure 7D**). Moreover, serial section  
278 immunohistochemistry showed 3.83% Desmin<sup>+</sup> HSCs underwent apoptosis  
279 and 7.26% mGFP<sup>+</sup> HSCs underwent apoptosis which was almost 2 times as  
280 high as the percentage of Desmin<sup>+</sup> HSCs undergoing apoptosis (**Figure 7E**).  
281 These findings indicated that mGFP<sup>+</sup> HSCs were more susceptible to apoptosis  
282 than Desmin<sup>+</sup> HSCs.

283 To ensure our findings that mGFP<sup>+</sup> HSCs were a different subset compared to  
284 total HSCs, we chose Vimentin as another total HSC marker(17).

285 Immunohistochemistry of Desmin and Vimentin in sham-operated and BDL-  
286 induced livers showed that Vimentin<sup>+</sup> HSC's characteristics were similar to  
287 Desmin<sup>+</sup> HSC's (**Supplemental Figure 3A**), and immunostaining of mGFP and  
288 Desmin or Vimentin showed that the percentage of mGFP accounted for  
289 Vimentin<sup>+</sup> HSCs had no difference compared to Desmin<sup>+</sup> HSCs  
290 (**Supplemental Figure 3B**). And the results of immunohistochemistry of mGFP  
291 and Desmin or Vimentin in normal and CCl<sub>4</sub>-treated livers were consistent with  
292 results in sham-operated and BDL-induced livers (**Supplemental Figure 3C**  
293 **and D**).

## 294 **Discussion**

295 Reelin as a serine protease, play an important role in brain (42, 43). But which  
296 type of cells in livers expressing Reelin was controversial. Cell lineage tracing  
297 is a technique to track cell fate based on cre-lox system, revealing self-renewal,  
298 differentiation and migration of specific types of cells in development, disease  
299 and regeneration(23). Early studies applied cell lineage tracing to confirm a  
300 certain cell lineage is stem cells or investigate epithelial-to-mesenchymal  
301 transition (EMT) and MET(21). In our study, we pioneeringly changed the  
302 conventional usage of cell lineage tracing and applied this technique to  
303 demonstrate that Reelin was expressed in HSCs using Reelin<sup>CreERT2</sup>; R26T/G<sup>f</sup>  
304 mouse model and these ReelinCreERT2-labeled HSCs were a new subset,  
305 which displayed different characteristics compared to Desmin<sup>+</sup> HSCs in vivo.  
306 We investigated properties of mGFP<sup>+</sup> (Reelin<sup>+</sup>) HSCs and Desmin<sup>+</sup> HSCs in

307 activation, migration, and proliferation in BDL-induced and CCl<sub>4</sub>-induced fibrotic  
308 livers. Our results showed that in BDL-induced fibrotic livers, Desmin<sup>+</sup> HSCs  
309 accumulated around the portal vein with significant proliferation and activation,  
310 whereas Reelin<sup>+</sup> HSCs did not migrate either proliferate, and only a small part  
311 was activated compared to Desmin<sup>+</sup> HSCs. HSC's activation and proliferation  
312 usually are considered as a accompanying process(10), but our results indicate  
313 that the processes of activation and proliferation of HSCs are independent in  
314 some degree under certain conditions. And we observed that CCl<sub>4</sub>-Reelin<sup>+</sup>  
315 HSCs exhibited similarity to CCl<sub>4</sub>-Desmin<sup>+</sup> HSCs rather than BDL-Reelin<sup>+</sup> HSCs.  
316 In CCl<sub>4</sub>-induced fibrotic livers, both of Desmin<sup>+</sup> HSCs and Reelin<sup>+</sup> HSCs  
317 accumulated around the central vein with remarkable proliferation activity, but  
318 the proliferative rate between Desmin<sup>+</sup> and Reelin<sup>+</sup> HSCs had no significant  
319 differences. The activation potential analysis of Desmin<sup>+</sup> HSCs and Reelin<sup>+</sup>  
320 HSCs showed Desmin<sup>+</sup> HSCs and Reelin<sup>+</sup> HSCs were both activated markedly,  
321 but fewer mGFP<sup>+</sup> HSCs were activated compared to Desmin<sup>+</sup> HSCs. Single-  
322 cell RNA sequencing is also a powerful method to identify a certain type of cell's  
323 characteristics and has demonstrated distinct HSC clusters exist in normal or  
324 injured livers(9, 30). But physiological conditions are different from in vitro  
325 culture environments, for instance, cellular microenvironment, cytokines, cell-  
326 cell junction, et al, which might change the gene expression and chromatin state  
327 of HSCs(44, 45). So, single-cell RNA sequencing might get an incorrect result  
328 because of the difference of physiological conditions and in vitro culture

329 environments. Compared to Single-cell RNA sequencing, our cell lineage  
330 tracing findings are closer to Reelin<sup>+</sup> HSCs physiological properties in vivo.

331 To verify HSCs transforming into hepatocytes and cholangiocytes through MET,  
332 we traced Reelin<sup>+</sup> HSC's fate both in BDL-induced and CCl<sub>4</sub>-induced injured  
333 livers and we observed no Reelin<sup>+</sup> HSCs expressed CK19 or HNF4 $\alpha$ . In  
334 consideration of ReelinCreERT2 only marked about 50% HSCs, it is still  
335 possible that HSCs not marked by ReelinCreERT2 differentiate into  
336 cholangiocytes or hepatocytes through MET. Whether HSCs differentiating  
337 into cholangiocytes or hepatocytes through MET should be further investigated.

338 Unexpectedly, in the regression of fibrosis, Desmin<sup>+</sup> HSC's number decreased  
339 to normal, but Reelin<sup>+</sup> HSCs accounting for about 50% Desmin<sup>+</sup> HSCs almost  
340 all disappeared because of apoptosis. Combining the early researches which  
341 reported that 50% of HSCs underwent inactivation during the liver injury  
342 recovery(28, 29), we speculated that Reelin<sup>+</sup> HSCs underwent apoptosis and  
343 Reelin<sup>-</sup> HSCs underwent inactivation in the regression of fibrosis.

344 We have not elucidated why there are marked differences in migration,  
345 activation and proliferation among BDL-Reelin<sup>+</sup> HSCs, CCl<sub>4</sub>-Reelin<sup>+</sup> HSCs,  
346 BDL-Desmin<sup>+</sup> HSCs, and CCl<sub>4</sub>-Desmin<sup>+</sup> HSCs. HSCs are main source of MFs  
347 independent of etiologies. In consideration of the heterogeneity of HSCs,  
348 properties of distinct clusters of HSCs are various in the same or different  
349 etiologies(30, 40). Portal fibroblasts (PFs) also are activated in BDL-induced  
350 liver injury, which are accumulated around the portal area and play a crucial



351 part at the early stage of BDL-induced liver fibrosis(46, 47), and promote HSCs  
352 activation(18). Based on the findings that both of PFs and HSCs accumulating  
353 around the portal area(8, 47), and Reelin<sup>+</sup> HSCs scattered throughout the  
354 parenchyma, we speculate PFs may have more effects on Desmin<sup>+</sup> HSCs  
355 rather than Reelin<sup>+</sup> HSCs though we did not investigate the interaction between  
356 PFs, Desmin<sup>+</sup> HSCs, and Reelin<sup>+</sup> HSCs. Additionally, the mechanisms of  
357 fibrogenesis are different in BDL and CCl<sub>4</sub> induced liver injuries(35). BDL mainly  
358 results in obstruction of bile flow and increased biliary pressure which further  
359 gives rise to hyperplasia of biliary epithelial cells, causing cholestatic injury that  
360 progress to periportal fibrosis and cirrhosis(36). While CCl<sub>4</sub> is hepatotoxic,  
361 leading to free radical reactions, lipid peroxidation, inflammatory response and  
362 necrosis of hepatocytes, and gives rise to an initial pericentral matrix  
363 deposition(38, 48). The differences in migration, activation and proliferation  
364 activities between Reelin<sup>+</sup> HSCs and Desmin<sup>+</sup> HSCs in BDL and CCl<sub>4</sub> induced  
365 liver fibrosis maybe also caused by the model-specific influence.

366 In conclusion, we pioneeringly using cell lineage tracing have demonstrated that  
367 ReelinCreERT2-labeled HSCs are a new cluster which displays different  
368 characteristics compared to Desmin<sup>+</sup> HSCs in BDL-induced and CCl<sub>4</sub>-induced  
369 fibrotic livers. And our findings enlighten that treating liver fibrosis caused by  
370 different etiologies should suit the remedy to the case, for instance, focusing on  
371 Reelin<sup>+</sup> HSCs may be a good therapy target in CCl<sub>4</sub>-induced liver fibrosis

372 (hepatotoxic injury), however, controlling the Reelin<sup>-</sup> HSCs may optimize the  
373 therapeutic effects in BDL-induced liver fibrosis (cholestatic injury).

## 374 **Materials and methods**

### 375 **Mice**

376 The animals in this study were against a C57BL6/J background. Rosa26mTmG  
377 reporter mice were obtained from Jackson Laboratory. ReelinCreERT2 mice  
378 were constructed by Biocytogen (Beijing, China). The P2A-iCreERT2 cassette  
379 was inserted after the stop codon TGA of Exon64 of Reelin and the knock-in  
380 mice were prepared based on the CRISPR/Cas9-based system developed by  
381 Biocytogen. ReelinCreERT2 mice were crossed with Rosa26mTmG reporter  
382 mice to generate Reelin<sup>CreERT2</sup>; Rosa26mTmG<sup>flox</sup> (R26T/G<sup>f</sup>) mice used for  
383 subsequent experiments. ReelinCreERT2 genotype identification was  
384 performed by using forward primer 5'-CTCTGCTGCCTCCTGGCTTCT and  
385 reverse primer 5'-TCAATGGGCGGGGGTTCGTT. Rosa26mTmG reporter mice  
386 genotype identification was conducted by using forward primer 5'-  
387 TATTCTGTCCCTAGGCGGTGAAGTCT and reverse primer 5'-  
388 CCTGTCCCTGAACATGTCCATCAG. All animal experiment procedures were  
389 in accordance with guidelines of Huazhong Agricultural University Guidelines  
390 for the Care and Use of Laboratory Animals.

### 391 **Fibrosis Induction and Tamoxifen Injection**

392 Hepatic fibrosis was induced by intraperitoneal injections of carbontetrachloride  
393 (CCl<sub>4</sub>) (Aladdin, C112043, Shanghai, China) at the dose of 1ml/kg body weight,  
394 two times a week for 6-week (n=7), followed by 7-day (n=4), 3-week (n=6), or  
395 5-week (n=6) recovery or induced by BDL for 2 weeks (n=5). CCl<sub>4</sub> was  
396 dissolved in corn oil (Aladdin, C116023) at a ratio of 1:4. The number of mice  
397 treated with vehicle was 6 and the number of sham-operated mice was 3.  
398 ReelinCreERT2 activity was induced by intraperitoneal injections of tamoxifen  
399 (Sigma, T5648, Missouri, USA) at the dose of 100 mg/kg on daily basis for 3  
400 days starting 7 days before the first CCl<sub>4</sub> injection. Bromodeoxyuridine (BrdU)  
401 (Sigma, B5002) was injected at the dose of 50 mg/kg body weight every two  
402 hours for 4 times, the last injection was taken 24 hours before sacrifice.

#### 403 **Tunel (terminal deoxynucleotidyl transferase dUTP nick end labeling)**

404 We detected DNA fragmentation resulting from apoptotic signaling cascades  
405 with the In Situ Cell Death Detection Kit Fluorescein (Roche, 11684795910,  
406 Basel, Switzerland) according to manufacturer's instructions. The presence of  
407 nicks in the DNA was identified by terminal deoxynucleotidyl transferase (TdT),  
408 an enzyme that catalyzed the addition of labeled dUTPs. The samples were  
409 digested with DNase and used as staining positive control.

#### 410 **Immunofluorescent Assay**

411 Samples were fixed in 4% paraformaldehyde (PFA), embedded in paraffin, cut  
412 into 4 μm sections, dewaxed, hydrated, and subsequently incubated with

413 antibodies. Fluorescence was bleached with 3% H<sub>2</sub>O<sub>2</sub> in methanol for 15  
414 minutes. For antigen retrieval, samples were heated in 10 mM sodium citrate  
415 buffer (pH 6.0) for 20 minutes. Sections were blocked with 10% goat serum for  
416 30 minutes and incubated with primary antibodies, anti-GFP (Proteintech,  
417 50430-AP, Wuhan, China), anti-GFP (Santa Cruz, sc-9996, Texas, USA), anti-  
418 desmin (Servicebio, GB12081, Wuhan, China), anti-GS(glutamine synthetase)  
419 (Santa Cruz, sc-74430), anti-CK19 (Servicebio, GB12197), and anti-  
420 HNF4 $\alpha$  (Abcam, Ab41898, Cambridgeshire, UK), anti-Vimentin (Abcam,  
421 Ab92547), anti-Casp3 (Proteintech, 19677-1-AP), anti-BrdU (Servicebio,  
422 GB12051), anti-Ki67(Invitrogen, PA5-19462, Massachusetts, USA).  
423 Subsequently, sections were incubated with fluorophore-conjugated secondary  
424 antibodies (2.5  $\mu$ g/ml, Invitrogen, A-11034, A-21424), nuclei co-staining with 4,  
425 6-diamidino-2-phenylindole (DAPI) (Abcam, ab104139). Images were acquired  
426 with a laser scanning confocal microscope (Carl Zeiss Microscopy, LSM710,  
427 Jena, Germany), and were analyzed by Zen software with fixed parameters.

## 428 **Histology and immunohistochemistry**

429 Liver tissues were immobilized with 4% PFA, dehydrated, embedded in paraffin,  
430 sectioned at 4  $\mu$ m, and processed for Sirius red staining and  
431 immunohistochemistry. Immunohistochemistry was performed with antibodies,  
432 anti-GFP (Santa Cruz, sc-9996) and anti-Reelin (NOVUS, NB600-1081,  
433 Minneapolis, USA). Subsequently sections were incubated with  
434 diaminobenzidine (Gene Tech Company Limited, GK347011, Shanghai, China)

435 and counterstaining with hematoxylin (Servicebio, GB1004). All steps of  
436 immunohistochemistry are according to manufacturer's instructions.

#### 437 **Software–Intensity measurement**

438 Image Pro Plus (Image Pro Plus v.7: Media Cybernetics; Bethesda, MD), as an  
439 analysis program, was used to analyze and quantify data from  
440 photomicrographs. In this study, the analyses were performed as follows:  
441 Integrated Optical Density (IOD) Image Pro Plus was used to quantify the  
442 intensity of probes binding to the structures. We used the confocal series to  
443 calculate the total binding intensity of the probes (IOD-intensity value).

#### 444 **Statistical analysis**

445 Statistical analyses were performed using the GraphPad Prism 6(GraphPad).  
446 Data are expressed as means  $\pm$  SEM. Comparisons between two groups were  
447 performed using the two-tailed Student's t-test. Comparisons between multiple  
448 groups were performed using ordinary one-way ANOVA with the Dunnett's  
449 multiple comparison test. Statistical significance was presented at the level of  
450 \* $p < 0.05$ , \*\* $p < 0.01$ , \*\*\* $p < 0.001$ .

#### 451 **Acknowledgements**

452 This work was supported by National Key R&D Plan no. 2017YFA0103202 and  
453 no. 2017YFA0103200, National Natural Science Foundation of China  
454 32071143, the Fundamental Research Funds for the Central Universities  
455 (2662019YJ008), and Huazhong Agricultural University Startup funds. We are  
456 thankful to Nannan Niu, and Bingjie Li (Huazhong Agricultural University) for

457 critical reading of the manuscript.

#### 458 **Author contributions**

459 N. C. and L. Z. conceived and designed the study; N. C. provided the  
460 experimental data; N.C. and S.L. performed the experiments; D.Q., D.G., Y.C.,  
461 C.H., and S.Z. provided assistance in animal experiments; N.C. and L. Z.  
462 discussed and drafted the manuscript; L. W. and X. C reviewed the manuscript;  
463 L.Z and N.C. organized the data and wrote the manuscript.

#### 464 **Competing interests**

465 The authors declare that there is no conflict of interests regarding the  
466 publication of this paper.

#### 467 **Ethic statement**

468 All animal experiments conducted were compliant with Huazhong Agricultural  
469 University Guidelines for the Care and Use of Laboratory Animals

#### 470 **Data availability**

471 The data that support the findings of this study are available from the  
472 corresponding author upon reasonable request.

473

474

475

476

477

478 **Figures**

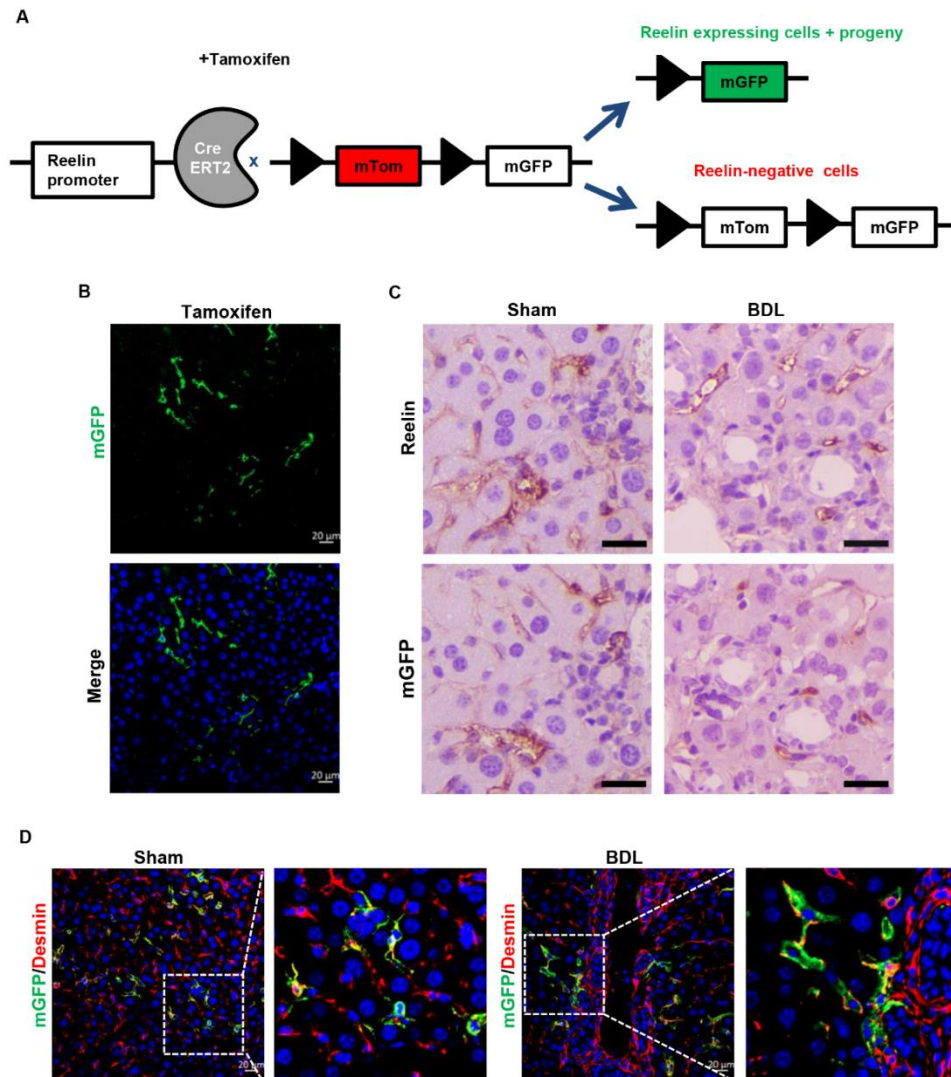

479

480 **Figure 1. Reelin is expressed in HSCs in the sham and BDL treated livers.**

481 **A.** Schematic diagram showing mTom/mGFP reporter gene expression in the absence and presence of  
482 tamoxifen-inducible CreERT2-mediated recombination. **B.** After treated with TAM, mGFP was induced in  
483 Reelin<sup>CreERT2</sup>; R26T/G<sup>f</sup> mice. **C.** Livers from sham or BDL-operated Reelin<sup>CreERT2</sup>; R26T/G<sup>f</sup> mice were  
484 stained with anti-Reelin and anti-GFP antibodies, and analyzed immunohistochemistry demonstrating  
485 overlap between ReelinCreERT2-induced mGFP expression and endogenous Reelin expression in serial  
486 sections. **D.** Immunohistochemistry of the sham or BDL-operated adult Reelin<sup>CreERT2</sup>; R26T/G<sup>f</sup> mouse  
487 livers for mGFP with Desmin demonstrated that Reelin was expressed in HSCs and only part of HSCs  
488 expressed mGFP. Scale bar in B and D represents 20 μm. Scale bar in C represents 50 μm.

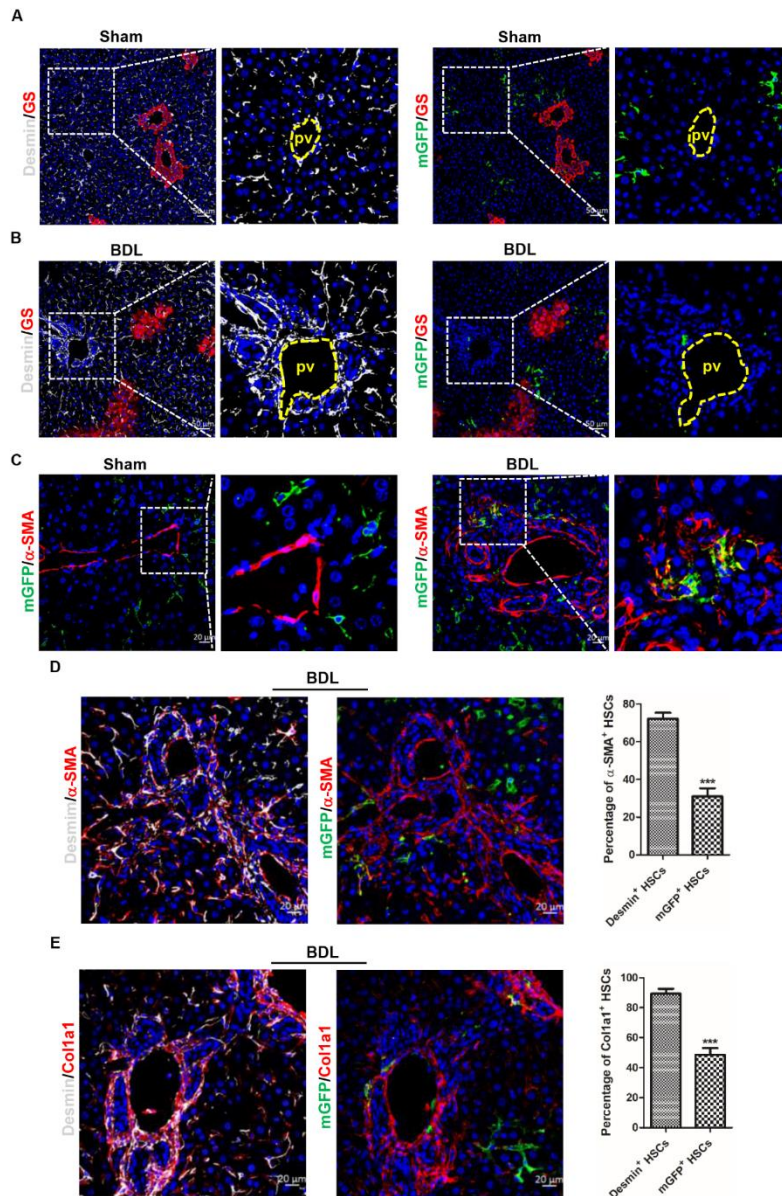

489

490 **Figure 2. ReelinCreERT2 labeled HSCs do not accumulate and fewer cells are activated compared**  
 491 **to Desmin<sup>+</sup> HSCs in BDL-induced fibrotic livers.**

492 **A.** mGFP and Desmin costaining with GS in sham-operated Reelin<sup>CreERT2</sup>; R26T/G<sup>f</sup> mouse liver  
 493 determined that mGFP<sup>+</sup> HSCs and Desmin<sup>+</sup> HSCs were scattered throughout the parenchyma. **B.** mGFP  
 494 and Desmin costaining with GS in BDL-operated Reelin<sup>CreERT2</sup>; R26T/G<sup>f</sup> mouse liver for 2 weeks indicated  
 495 that Desmin<sup>+</sup> HSCs accumulated around the portal vein (pv), whereas mGFP<sup>+</sup> HSCs were scattered  
 496 throughout the parenchyma. **C.** mGFP<sup>+</sup> HSCs were activated in BDL-induced Reelin<sup>CreERT2</sup>; R26T/G<sup>f</sup>  
 497 mouse fibrotic livers observed by immunohistochemistry of mGFP and  $\alpha$ -SMA. **D.** Immunohistochemistry  
 498 of the BDL-induced fibrotic livers for Desmin with  $\alpha$ -SMA and mGFP with  $\alpha$ -SMA observed that fewer  
 499 mGFP<sup>+</sup> HSCs expressed  $\alpha$ -SMA. **E.** Analyzed immunohistochemistry of the BDL-induced fibrotic livers for  
 500 Desmin with Col1a1 and mGFP with Col1a1 determined that fewer mGFP<sup>+</sup> HSCs expressed Col1a1. Data  
 501 are reported as means  $\pm$  SEM. \*p < 0.05; \*\*p < 0.01; \*\*\*p < 0.001. Scale bar in A and B represents 50  $\mu$ m.  
 502 Scale bar in C, D, and E represents 20  $\mu$ m.



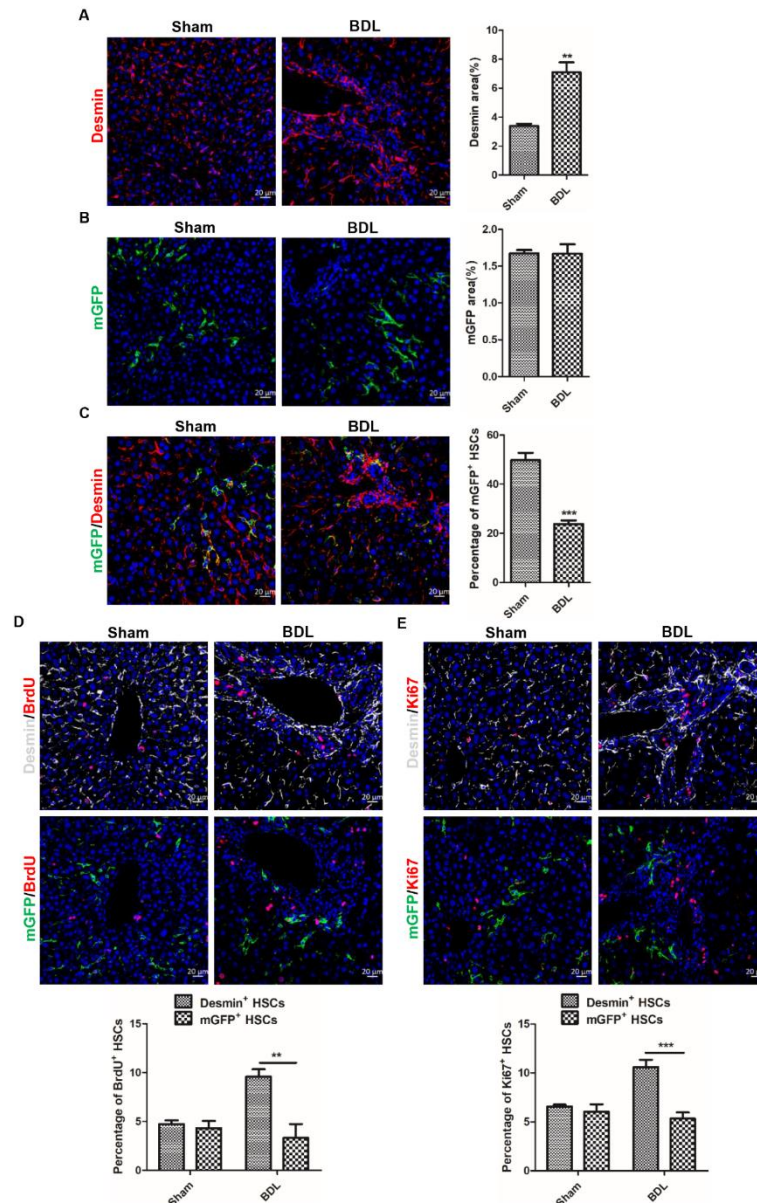

503 **Figure 3. ReelinCreERT2 labeled HSCs do not show proliferation capacity in BDL-induced fibrotic**  
 504 **livers.**

505 **A.** The number of Desmin<sup>+</sup> HSCs increased significantly in BDL-induced liver injury observed by  
 506 immunohistochemistry of Desmin<sup>+</sup> HSCs. **B.** Analyzed immunohistochemistry of mGFP<sup>+</sup> HSCs indicated  
 507 that the number of mGFP<sup>+</sup> HSCs was not increased in injured livers induced by BDL. **C.** The percentage  
 508 of mGFP<sup>+</sup> HSCs accounted for Desmin<sup>+</sup> HSCs was significantly reduced in Reelin<sup>CreERT2</sup>; R26T/G<sup>f</sup> mouse  
 509 fibrotic livers determined by BDL Immunostaining of mGFP and Desmin. **D.** Proliferative properties of  
 510 Reelin<sup>+</sup> HSCs and Desmin<sup>+</sup> HSCs determined by immunohistochemistry for BrdU with Desmin or mGFP  
 511 demonstrated that Desmin<sup>+</sup> HSCs proliferative properties significantly increased in BDL-induced liver  
 512 fibrosis comparing to sham-operated livers, but mGFP<sup>+</sup> HSCs proliferative properties had no difference.  
 513 **E.** Immunohistochemistry for Ki67 with Desmin or mGFP demonstrated that Desmin<sup>+</sup> HSCs proliferative  
 514 properties significantly increased in BDL-induced liver fibrosis comparing to sham-operated livers, but  
 515 mGFP<sup>+</sup> HSCs proliferative properties had no difference. Data are reported as means  $\pm$  SEM. \* $p < 0.05$ ;  
 516 \*\* $p < 0.01$ ; \*\*\* $p < 0.001$ . Scale bar represents 20  $\mu\text{m}$ .

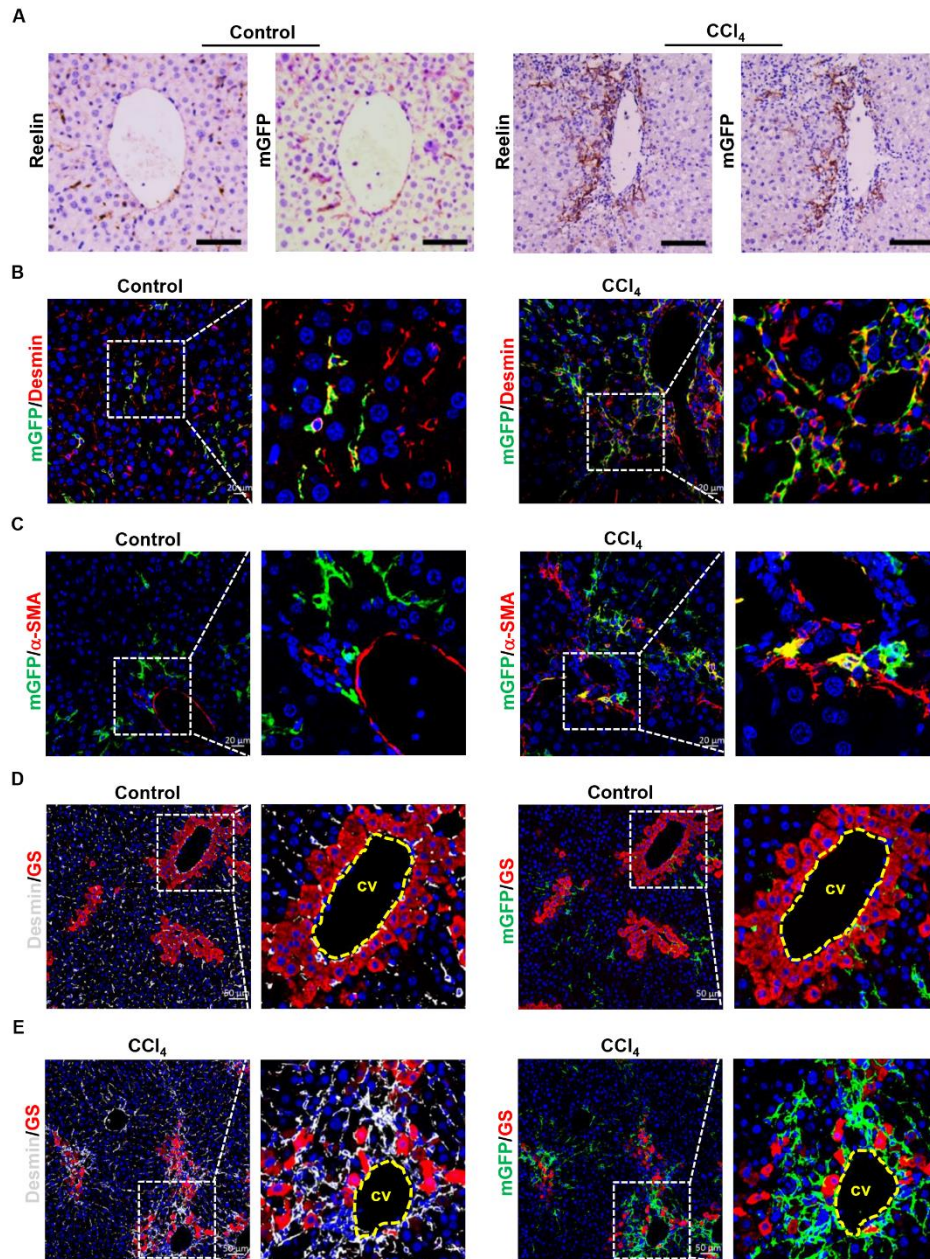

517 **Figure 4. Genetically labeled Reelin<sup>+</sup> HSCs accumulate around the central veins and fibrous septa**  
518 **in CCl<sub>4</sub>-induced injured livers.**

519 **A.** Immunostaining of Reelin and mGFP in vehicle-treated or CCl<sub>4</sub>-treated Reelin<sup>CreERT2</sup>; R26T/G<sup>f</sup> mouse  
520 livers for 6-week demonstrated overlap between endogenous Reelin expression and Reelin<sup>CreERT2</sup>-  
521 induced mGFP expression in serial sections. **B.** Immunohistochemistry of normal or fibrotic livers induced  
522 by CCl<sub>4</sub> for mGFP and Desmin showed that mGFP was located in part of HSCs. **C.** Activated mGFP<sup>+</sup>  
523 HSCs were observed in CCl<sub>4</sub>-induced fibrotic livers by immunostaining of mGFP and α-SMA. **D.**  
524 Immunohistochemistry of normal livers for GS with mGFP or Desmin showed mGFP<sup>+</sup> HSCs and Desmin<sup>+</sup>  
525 HSCs were scattered throughout the parenchyma. **E.** Immunohistochemistry of CCl<sub>4</sub>-induced fibrotic livers  
526 for GS with mGFP or Desmin showed both mGFP<sup>+</sup> HSCs and Desmin<sup>+</sup> HSCs accumulated around the  
527 central veins (cv) and fibrous septa. Scale bar in A represents 100 μm. Scale bar in B and C represents  
528 100 μm. Scale bar in A represents 50 μm.

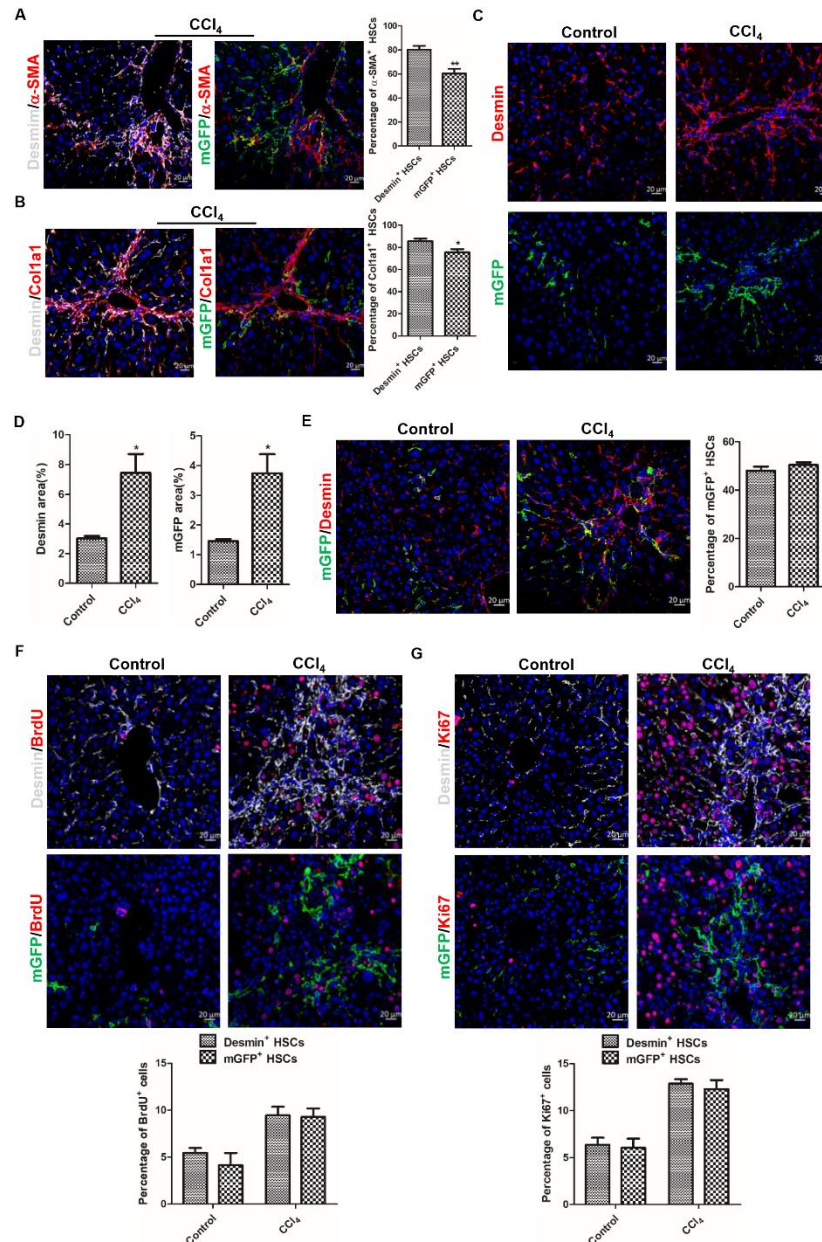

529 **Figure 5. Fewer GFP<sup>+</sup> HSCs are activated compared to Desmin<sup>+</sup> HSCs in CCl<sub>4</sub>-induced injured**  
 530 **livers.**

531 **A.** Analyzed immunohistochemistry of Reelin<sup>CreERT2</sup>; R26T/G<sup>f</sup> mice treated with CCl<sub>4</sub> for 6-week for  $\alpha$ -SMA  
 532 with mGFP or Desmin demonstrated that fewer mGFP<sup>+</sup> HSCs expressed  $\alpha$ -SMA. **B.** Immunostaining for  
 533 Col1a1 with mGFP or Desmin observed that fewer mGFP<sup>+</sup> HSCs expressed Col1a1. **C.** Immunostaining  
 534 of mGFP and Desmin displayed that the number of Desmin<sup>+</sup> HSCs and mGFP<sup>+</sup> HSCs was significantly  
 535 increased in CCl<sub>4</sub>-induced fibrotic livers. **D.** Quantification data of Desmin<sup>+</sup> HSCs and mGFP<sup>+</sup> HSCs. **E.**  
 536 Analyzed immunostaining of mGFP and Desmin indicated that the percentage of mGFP<sup>+</sup> HSCs accounted  
 537 for Desmin<sup>+</sup> HSCs had no significant difference in fibrotic livers induced by CCl<sub>4</sub> compared to in normal  
 538 livers. **F.** Proliferative properties of Reelin<sup>+</sup> HSCs were determined by BrdU costaining with desmin or  
 539 mGFP in serial sections of the mice treated with vehicle or CCl<sub>4</sub> for 6-week, and Desmin<sup>+</sup> HSCs and  
 540 mGFP<sup>+</sup> HSCs showed significant proliferation activity following CCl<sub>4</sub> injection. **G.** Proliferative properties  
 541 of Desmin<sup>+</sup> HSCs and GFP<sup>+</sup> HSCs were determined by Ki67 in Desmin<sup>+</sup> HSCs and GFP<sup>+</sup> HSCs. Data are  
 542 reported as means  $\pm$  SEM. \*p < 0.05; \*\*p < 0.01; \*\*\*p < 0.001. Scale bar represents 20  $\mu$ m.

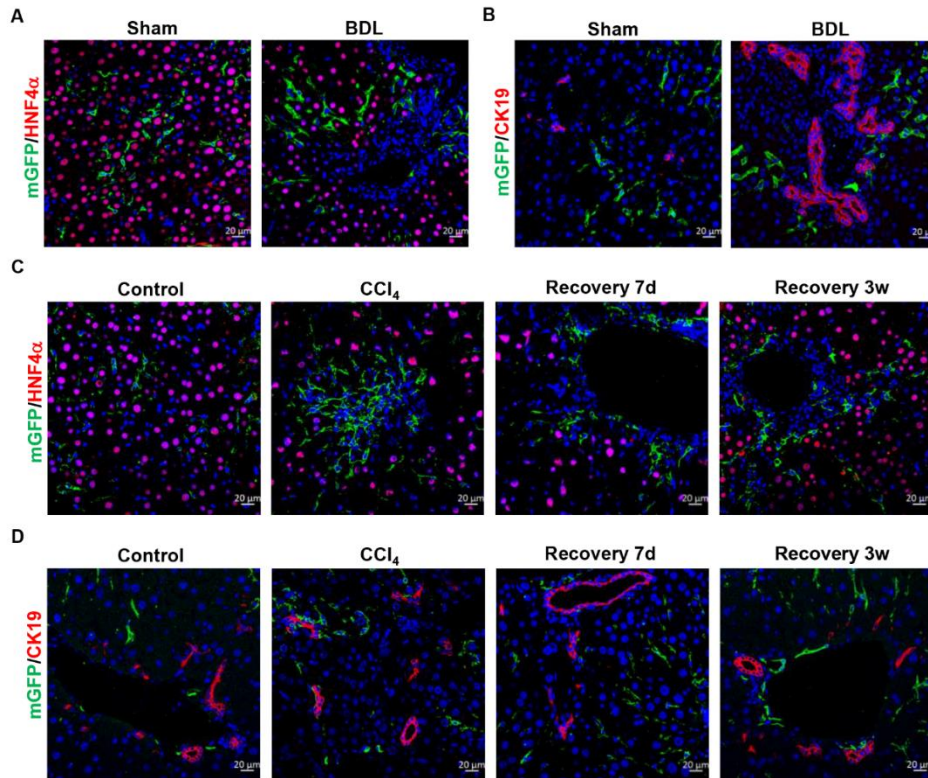

543

544 **Figure 6. Genetically labeled Reelin<sup>+</sup> HSCs do not undergo MET in response to chronic liver injury**  
545 **or recovery from fibrosis.**

546 **A.** No genetically labeled mGFP<sup>+</sup> HSCs was observed expressing hepatocytes marker HNF4 $\alpha$  in sham-  
547 sham-operated livers or BDL-induced fibrotic livers. **B.** Genetically labeled mGFP<sup>+</sup> HSCs did not express  
548 cholangiocytes marker CK19 in sham-operated livers or BDL-induced fibrotic livers. **C.** Genetically labeled  
549 mGFP<sup>+</sup> HSCs in livers treated with vehicle or in livers in response to CCl<sub>4</sub> for 6-week, recovery from CCl<sub>4</sub>  
550 for 7-day or 3-week did not express hepatocytes marker HNF4 $\alpha$  in ReelinCreERT2 mice. **D.** Genetically  
551 labeled mGFP<sup>+</sup> HSCs in normal livers or in livers in response to CCl<sub>4</sub> for 6-week, recovery 7-day or 3-  
552 week from CCl<sub>4</sub> in ReelinCreERT2 mice did not express cholangiocytes marker CK19. Scale bar  
553 represents 20  $\mu$ m.

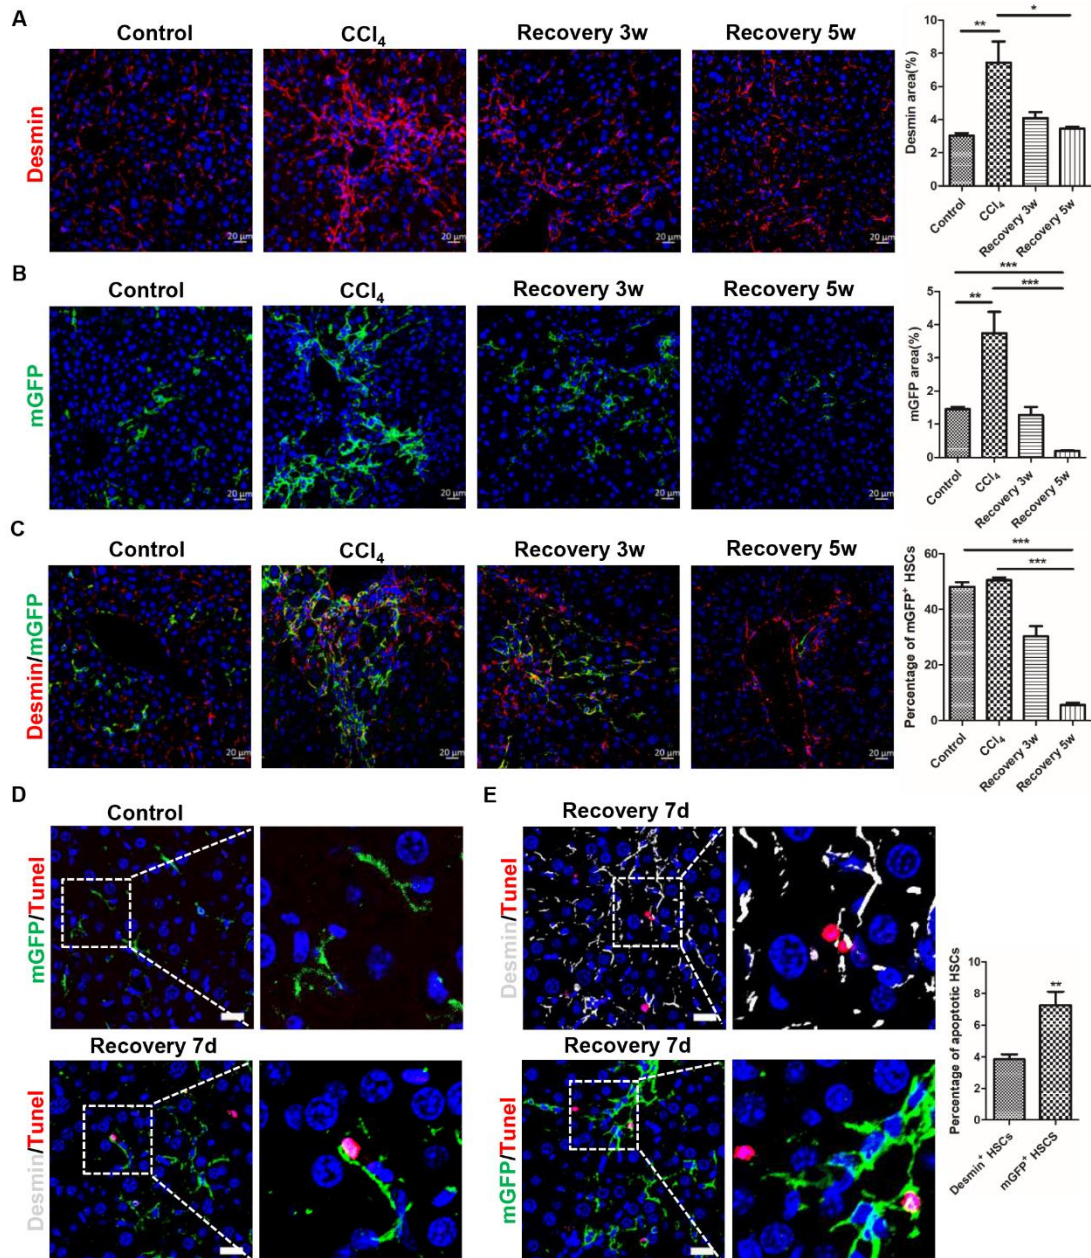

554

555 **Figure 7. Reelin<sup>+</sup> HSCs undergo apoptosis during recovery from CCl<sub>4</sub>-induced liver fibrosis.**

556 **A.** Immunostaining of Desmin in Reelin<sup>CreERT2</sup>; R26T/G<sup>f</sup> mouse livers indicated that the number of Desmin<sup>+</sup>  
557 HSCs recovered to normal level after CCl<sub>4</sub> treatment was terminated for 5 weeks. **B.** Few mGFP<sup>+</sup> HSCs  
558 existed after 5 weeks recovery from chronic CCl<sub>4</sub> injury by analyzing immunohistochemistry of liver for  
559 mGFP. **C.** Immunohistochemistry for mGFP with Desmin observed that the percentage of mGFP<sup>+</sup> HSCs  
560 accounted for Desmin<sup>+</sup> HSCs was reduced significantly during recovery from CCl<sub>4</sub>-induced liver fibrosis.  
561 **D.** Apoptosed mGFP<sup>+</sup> HSCs were observed by TUNEL in Reelin<sup>CreERT2</sup>; R26T/G<sup>f</sup> mouse livers recovery 7  
562 days from CCl<sub>4</sub>-induced liver fibrosis. **E.** Immunohistochemistry for TUNEL with mGFP or Desmin  
563 demonstrated that mGFP<sup>+</sup> HSCs were more likely to undergo apoptosis than Desmin<sup>+</sup> HSCs in serial  
564 sections. Data are reported as means ± SEM. \*p < 0.05; \*\*p < 0.01; \*\*\*p < 0.001. Scale bar represents  
565 20 μm.

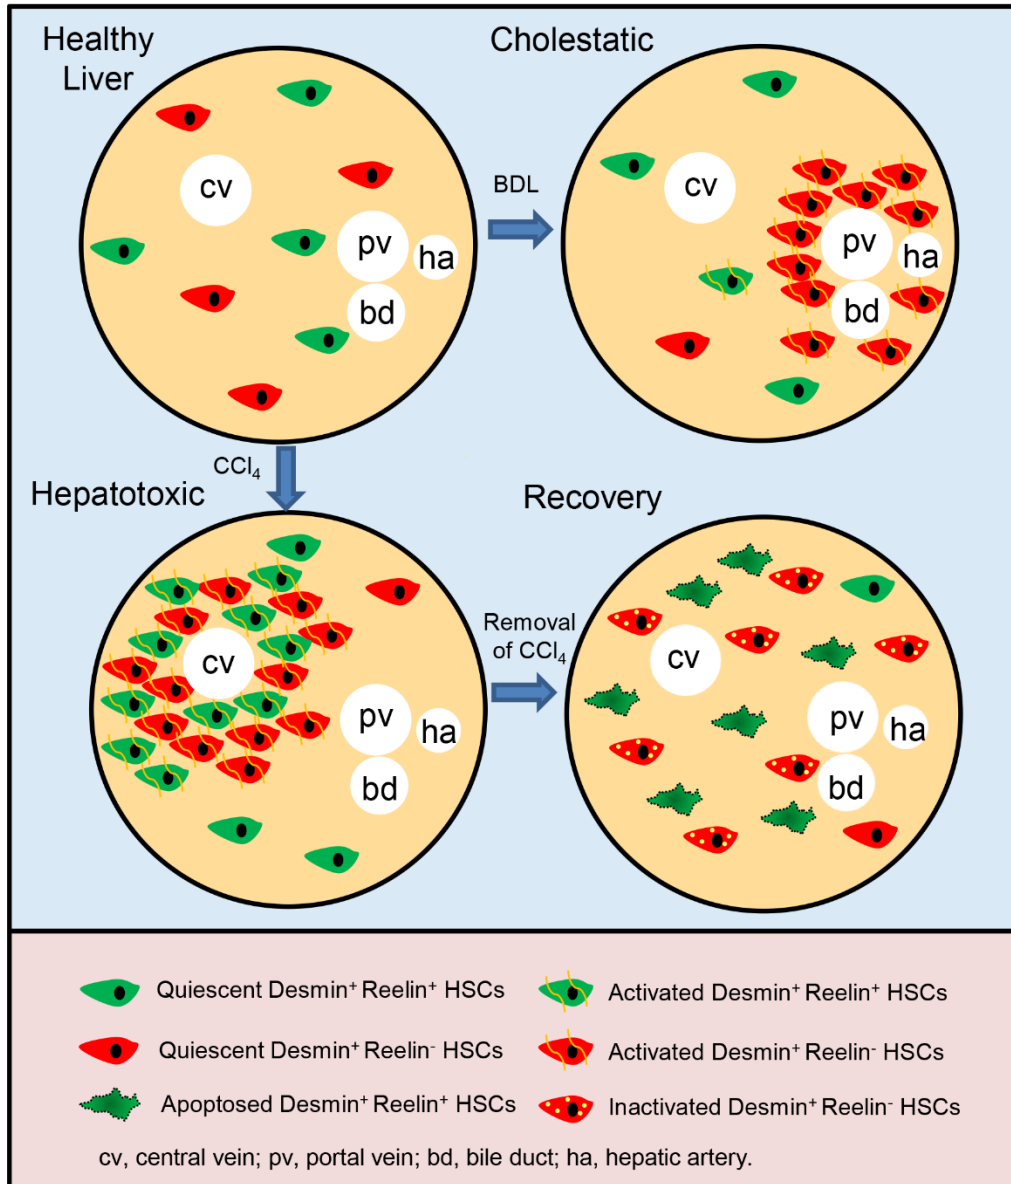

566

567 **Figure 8. Graphical Abstract.**

568 ● Cell lineage tracing reveals that about 50% HSCs are marked by ReelinCreERT2, and properties of  
 569 these ReelinCreERT2-marked HSCs (Desmin<sup>+</sup> Reelin<sup>+</sup> HSCs) are different from Desmin<sup>+</sup> Reelin<sup>-</sup>  
 570 HSCs.

571 ● In cholestatic injury model, Desmin<sup>+</sup> Reelin<sup>-</sup> HSCs are accumulated around the portal triad with a  
 572 significant activation and proliferation activity, but Desmin<sup>+</sup> Reelin<sup>+</sup> HSCs do not show proliferation  
 573 or migration to the portal triad, and only a small part is activated.

574 ● In hepatotoxic injury model, Desmin<sup>+</sup> Reelin<sup>+</sup> HSCs share similarities with Desmin<sup>+</sup> Reelin<sup>-</sup> HSCs in  
 575 migration, proliferation and activation, nonetheless, still fewer Desmin<sup>+</sup> Reelin<sup>+</sup> HSCs are activated.

576 ● In the regression of liver fibrosis, Desmin<sup>+</sup> Reelin<sup>+</sup> HSCs are apoptosed.

577

578 **Supplemental Figures**

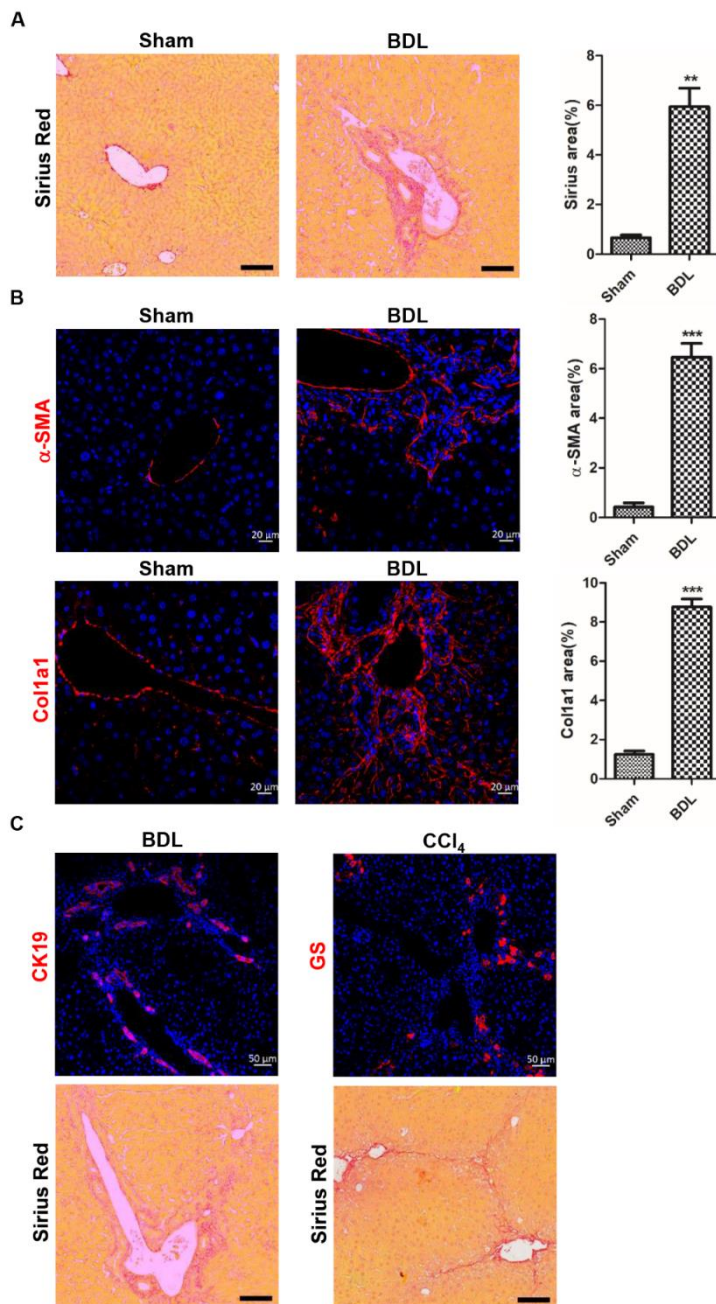

579

580 **Supplemental Figure 1. BDL induces severe biliary fibrosis.**

581 **A.** Sirius red staining displayed that severe biliary fibrosis was induced by BDL for 2 weeks in *Reelin<sup>CreERT2</sup>; R26T/G<sup>f</sup>* mice. **B.**  $\alpha$ -SMA and Col1a1 expression was significantly increased in BDL-operated  
582 *Reelin<sup>CreERT2</sup>; R26T/G<sup>f</sup>* mice. **C.** Immunohistochemistry for CK19, GS and Sirius red indicated that BDL  
583 caused biliary duct hyperplasia and biliary fibrosis, whereas CCl<sub>4</sub> led to pericentral cell injury and fibrosis  
584 and forming fibrous septum. Data are reported as means  $\pm$  SEM. \* $p < 0.05$ ; \*\* $p < 0.01$ ; \*\*\* $p < 0.001$ . Scale  
585 bar in A represents 100  $\mu$ m. Scale bar in B represents 20  $\mu$ m. Scale bar in C immunohistochemistry  
586 pictures represents 50  $\mu$ m and in Sirius red staining represents 100  $\mu$ m.  
587

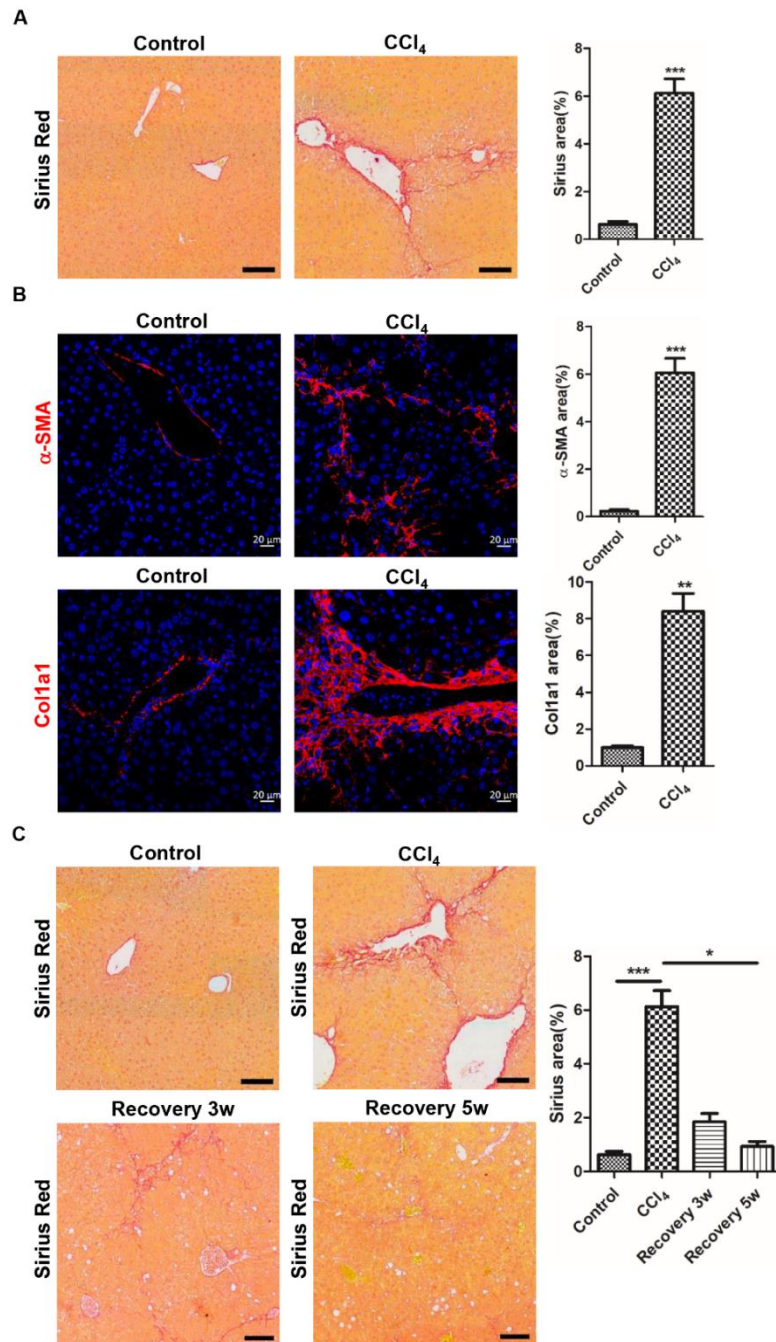

588

589 **Supplemental Figure 2. CCl<sub>4</sub> induces severe pericentral fibrosis.**

590 **A.** Severe pericentral fibrosis was induced by CCl<sub>4</sub> for 6 weeks in Reelin<sup>CreERT2</sup>; R26T/G<sup>f</sup> mice observed  
591 by sirius red staining. **B.** α-SMA and Col1a1 expression were significantly increased in CCl<sub>4</sub>-treated  
592 Reelin<sup>CreERT2</sup>; R26T/G<sup>f</sup> mice for 6 weeks. **C.** Sirius red staining indicated that after 5 weeks recovery from  
593 CCl<sub>4</sub>, fibrotic livers recovered to normal state. Data are reported as means ± SEM. \*p < 0.05; \*\*p < 0.01;  
594 \*\*\*p < 0.001. Scale bar in A and C represents 100 μm. Scale bar in B represents 20 μm.



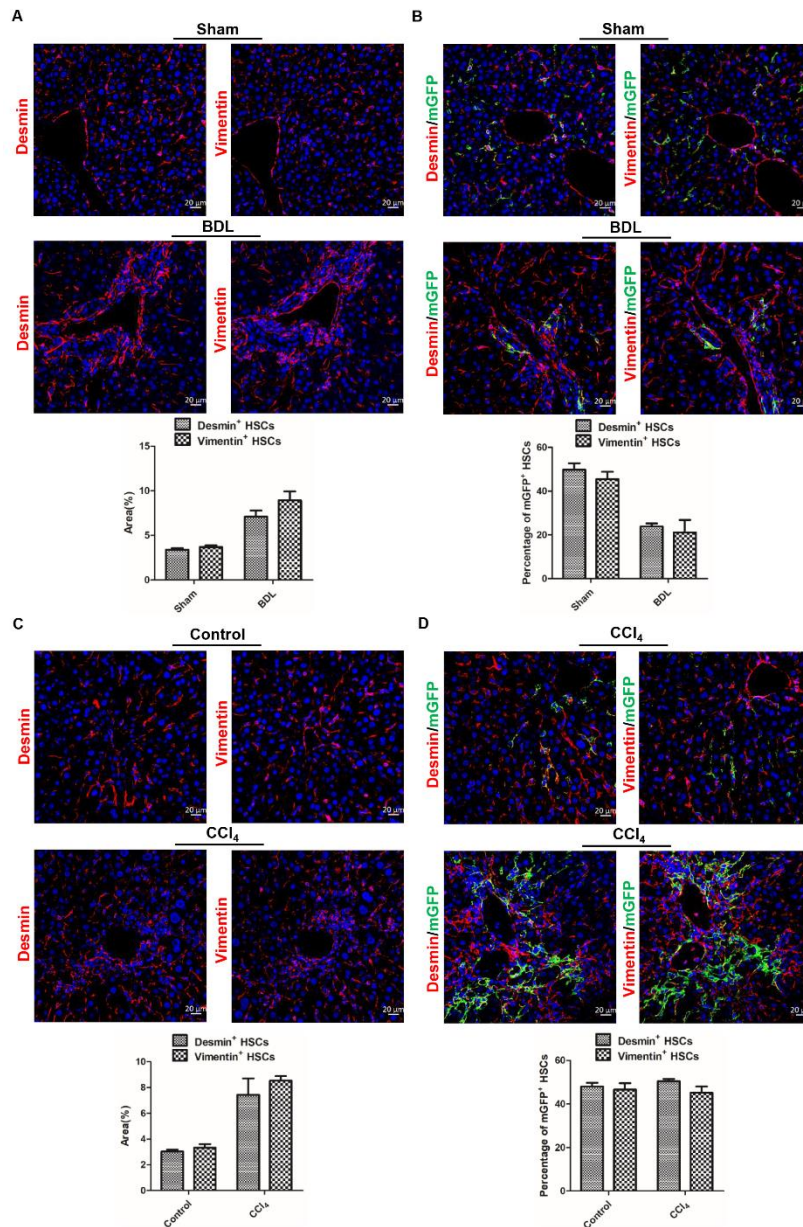

595

596 **Supplemental Figure 3. The characteristics of Vimentin<sup>+</sup> HSCs are consistent with Desmin<sup>+</sup> HSCs**  
 597 **in BDL-induced and CCl<sub>4</sub>-induced liver fibrosis.**

598 **A.** Serial sections immunostaining of Vimentin and Desmin indicated that the number and distribution of  
 599 Vimentin<sup>+</sup> HSCs were consistent with Desmin<sup>+</sup> HSCs in sham-operated and BDL-operated Reelin<sup>CreERT2</sup>;  
 600 R26T/G<sup>f</sup> mouse livers. **B.** Serial sections immunostaining of mGFP and Desmin or Vimentin determined  
 601 that the percentage of mGFP<sup>+</sup> HSCs accounted for Desmin<sup>+</sup> HSCs was similar to accounted for Vimentin<sup>+</sup>  
 602 HSCs in sham-operated and BDL-operated Reelin<sup>CreERT2</sup>; R26T/G<sup>f</sup> mouse livers. **C.** Serial sections  
 603 immunostaining of Vimentin and Desmin indicated that the number and distribution of Vimentin<sup>+</sup> HSCs  
 604 were consistent with Desmin<sup>+</sup> HSCs in normal and CCl<sub>4</sub>-treated Reelin<sup>CreERT2</sup>; R26T/G<sup>f</sup> mouse livers. **D.**  
 605 Serial sections immunostaining of mGFP and Desmin or Vimentin indicated that the percentage of mGFP<sup>+</sup>  
 606 HSCs accounted for Desmin<sup>+</sup> HSCs was similar to accounted for Vimentin<sup>+</sup> HSCs in in normal and CCl<sub>4</sub>-  
 607 treated Reelin<sup>CreERT2</sup>; R26T/G<sup>f</sup> mouse livers. Data are reported as means ± SEM. \*p < 0.05; \*\*p < 0.01; \*\*\*p  
 608 < 0.001. Scale bar represents 20 μm.

609 **References**

- 610 1. Faini G, Del Bene F, Albadri S. Reelin functions beyond neuronal migration: from synaptogenesis  
611 to network activity modulation. *Curr Opin Neurobiol.* 2021;66:135-43.
- 612 2. Khialeeva E, Chou JW, Allen DE, Chiu AM, Bensinger SJ, Carpenter EM. Reelin Deficiency Delays  
613 Mammary Tumor Growth and Metastatic Progression. *J Mammary Gland Biol Neoplasia.* 2017;22(1):59-  
614 69.
- 615 3. Ishii K, Kubo KI, Nakajima K. Reelin and Neuropsychiatric Disorders. *Front Cell Neurosci.*  
616 2016;10:229.
- 617 4. Smalheiser NR, Costa E, Guidotti A, Impagnatiello F, Auta J, Lacor P, Kriho V, Pappas GD. Expression  
618 of reelin in adult mammalian blood, liver, pituitary pars intermedia, and adrenal chromaffin cells.  
619 *Proceedings of the National Academy of Sciences.* 2000;97(3):1281-6.
- 620 5. Botella-Lopez A, de Madaria E, Jover R, Bataller R, Sancho-Bru P, Candela A, Compan A, Perez-  
621 Mateo M, Martinez S, Saez-Valero J. Reelin is overexpressed in the liver and plasma of bile duct ligated  
622 rats and its levels and glycosylation are altered in plasma of humans with cirrhosis. *Int J Biochem Cell*  
623 *Biol.* 2008;40(4):766-75.
- 624 6. Kobold D, Grundmann A, Piscaglia F, Eisenbach C, Neubauer K, Steffgen J, Ramadori G, Knittel T.  
625 Expression of reelin in hepatic stellate cells and during hepatic tissue repair: a novel marker for the  
626 differentiation of HSC from other liver myofibroblasts. *J Hepatol.* 2002;36(5):607-13.
- 627 7. Carotti S, Perrone G, Amato M, Vespasiani Gentilucci U, Righi D, Francesconi M, Pellegrini C, Zalfa  
628 F, Zingariello M, Picardi A, Onetti Muda A, Morini S. Reelin expression in human liver of patients with  
629 chronic hepatitis C infection. *Eur J Histochem.* 2017;61(1):2745.
- 630 8. Lua I, Li Y, Zagory JA, Wang KS, French SW, Sevigny J, Asahina K. Characterization of hepatic stellate  
631 cells, portal fibroblasts, and mesothelial cells in normal and fibrotic livers. *J Hepatol.* 2016;64(5):1137-  
632 46.
- 633 9. Lotto J, Drissler S, Cullum R, Wei W, Setty M, Bell EM, Boutet SC, Nowotschin S, Kuo YY, Garg V,  
634 Pe'er D, Church DM, Hadjantonakis AK, Hoodless PA. Single-Cell Transcriptomics Reveals Early  
635 Emergence of Liver Parenchymal and Non-parenchymal Cell Lineages. *Cell.* 2020;183(3):702-16 e14.
- 636 10. Higashi T, Friedman SL, Hoshida Y. Hepatic stellate cells as key target in liver fibrosis. *Adv Drug*  
637 *Deliv Rev.* 2017;121:27-42.
- 638 11. Tsuchida T, Friedman SL. Mechanisms of hepatic stellate cell activation. *Nature Reviews*  
639 *Gastroenterology & Hepatology.* 2017;14(7):397-411.
- 640 12. Yin C, Evason KJ, Asahina K, Stainier DY. Hepatic stellate cells in liver development, regeneration,  
641 and cancer. *J Clin Invest.* 2013;123(5):1902-10.
- 642 13. Hernandez-Gea V, Friedman SL. Pathogenesis of liver fibrosis. *Annu Rev Pathol.* 2011;6:425-56.
- 643 14. Lemoinne S, Cadoret A, El Mourabit H, Thabut D, Housset C. Origins and functions of liver  
644 myofibroblasts. *Biochim Biophys Acta.* 2013;1832(7):948-54.
- 645 15. Li J, Tuo B. Current and Emerging Approaches for Hepatic Fibrosis Treatment. *Gastroenterology*  
646 *research and practice.* 2021;2021:6612892.
- 647 16. Herrera J, Henke CA, Bitterman PB. Extracellular matrix as a driver of progressive fibrosis. *J Clin*  
648 *Invest.* 2018;128(1):45-53.
- 649 17. Kisseleva T. The origin of fibrogenic myofibroblasts in fibrotic liver. *Hepatology.* 2017;65(3):1039-  
650 43.

- 651 18. Iwaisako K, Jiang C, Zhang M, Cong M, Moore-Morris TJ, Park TJ, Liu X, Xu J, Wang P, Paik YH, Meng  
652 F, Asagiri M, Murray LA, Hofmann AF, Iida T, Glass CK, Brenner DA, Kisseleva T. Origin of myofibroblasts  
653 in the fibrotic liver in mice. *Proc Natl Acad Sci U S A*. 2014;111(32):E3297-305.
- 654 19. Mederacke I, Hsu CC, Troeger JS, Huebener P, Mu X, Dapito DH, Pradere JP, Schwabe RF. Fate  
655 tracing reveals hepatic stellate cells as dominant contributors to liver fibrosis independent of its  
656 aetiology. *Nature communications*. 2013;4:2823.
- 657 20. Pei D, Shu X, Gassama-Diagne A, Thiery JP. Mesenchymal-epithelial transition in development and  
658 reprogramming. *Nat Cell Biol*. 2019;21(1):44-53.
- 659 21. Xie G, Diehl AM. Evidence for and against epithelial-to-mesenchymal transition in the liver. *Am J*  
660 *Physiol Gastrointest Liver Physiol*. 2013;305(12):G881-90.
- 661 22. Choi SS, Diehl AM. Epithelial-to-mesenchymal transitions in the liver. *Hepatology*.  
662 2009;50(6):2007-13.
- 663 23. Yang L, Jung Y, Omenetti A, Witek RP, Choi S, Vandongen HM, Huang J, Alpini GD, Diehl AM. Fate-  
664 mapping evidence that hepatic stellate cells are epithelial progenitors in adult mouse livers. *Stem Cells*.  
665 2008;26(8):2104-13.
- 666 24. Swiderska-Syn M, Syn WK, Xie G, Kruger L, Machado MV, Karaca G, Michelotti GA, Choi SS,  
667 Premont RT, Diehl AM. Myofibroblastic cells function as progenitors to regenerate murine livers after  
668 partial hepatectomy. *Gut*. 2014;63(8):1333-44.
- 669 25. Michelotti GA, Xie G, Swiderska M, Choi SS, Karaca G, Kruger L, Premont R, Yang L, Syn WK,  
670 Metzger D, Diehl AM. Smoothed is a master regulator of adult liver repair. *J Clin Invest*.  
671 2013;123(6):2380-94.
- 672 26. Scholten D, Österreicher CH, Scholten A, Iwaisako K, Gu G, Brenner DA, Kisseleva T. Genetic  
673 Labeling Does Not Detect Epithelial-to-Mesenchymal Transition of Cholangiocytes in Liver Fibrosis in  
674 Mice. *Gastroenterology*. 2010;139(3):987-98.
- 675 27. Lua I, James D, Wang J, Wang KS, Asahina K. Mesodermal mesenchymal cells give rise to  
676 myofibroblasts, but not epithelial cells, in mouse liver injury. *Hepatology*. 2014;60(1):311-22.
- 677 28. Troeger JS, Mederacke I, Gwak GY, Dapito DH, Mu X, Hsu CC, Pradere JP, Friedman RA, Schwabe  
678 RF. Deactivation of hepatic stellate cells during liver fibrosis resolution in mice. *Gastroenterology*.  
679 2012;143(4):1073-83 e22.
- 680 29. Kisseleva T, Cong M, Paik Y, Scholten D, Jiang C, Benner C, Iwaisako K, Moore-Morris T, Scott B,  
681 Tsukamoto H, Evans SM, Dillmann W, Glass CK, Brenner DA. Myofibroblasts revert to an inactive  
682 phenotype during regression of liver fibrosis. *Proc Natl Acad Sci U S A*. 2012;109(24):9448-53.
- 683 30. Rosenthal SB, Liu X, Ganguly S, Dhar D, Pasillas MP, Ricciardelli E, Li RZ, Troutman TD, Kisseleva T,  
684 Glass CK, Brenner DA. Heterogeneity of HSCs in a Mouse Model of NASH. *Hepatology*. 2021;74(2):667-  
685 85.
- 686 31. Tao LL, Cheng YY, Ding D, Mei S, Xu JW, Yu J, Ou-Yang Q, Deng L, Chen Q, Li QQ, Xu ZD, Liu XP.  
687 C/EBP-alpha ameliorates CCl(4)-induced liver fibrosis in mice through promoting apoptosis of hepatic  
688 stellate cells with little apoptotic effect on hepatocytes in vitro and in vivo. *Apoptosis : an international*  
689 *journal on programmed cell death*. 2012;17(5):492-502.
- 690 32. Mannaerts I, Leite SB, Verhulst S, Claerhout S, Eysackers N, Thoen LFR, Hoorens A, Reynaert H,  
691 Halder G, van Grunsven LA. The Hippo pathway effector YAP controls mouse hepatic stellate cell  
692 activation. *J Hepatol*. 2015;63(3):679-88.

- 693 33. Hyun J, Wang S, Kim J, Rao KM, Park SY, Chung I, Ha CS, Kim SW, Yun YH, Jung Y. MicroRNA-378  
694 limits activation of hepatic stellate cells and liver fibrosis by suppressing Gli3 expression. *Nature*  
695 *communications*. 2016;7:10993.
- 696 34. Zheng L, Zhao Z, Lin J, Li H, Wu G, Qi X, Lou X, Bao Y, Huo H, Luo M. Telmisartan relieves liver  
697 fibrosis and portal hypertension by improving vascular remodeling and sinusoidal dysfunction. *Eur J*  
698 *Pharmacol*. 2022;915:174713.
- 699 35. Forbes SJ, Parola M. Liver fibrogenic cells. *Best Pract Res Clin Gastroenterol*. 2011;25(2):207-17.
- 700 36. Yanguas SC, Cogliati B, Willebrords J, Maes M, Colle I, van den Bossche B, de Oliveira C, Andraus  
701 W, Alves VAF, Leclercq I, Vinken M. Experimental models of liver fibrosis. *Arch Toxicol*. 2016;90(5):1025-  
702 48.
- 703 37. Moghadamrad S, Hassan M, McCoy KD, Kirundi J, Kellmann P, De Gottardi A. Attenuated fibrosis  
704 in specific pathogen-free microbiota in experimental cholestasis- and toxin-induced liver injury. *FASEB*  
705 *J*. 2019;33(11):12464-76.
- 706 38. Wu L, Zhang Q, Mo W, Feng J, Li S, Li J, Liu T, Xu S, Wang W, Lu X, Yu Q, Chen K, Xia Y, Lu J, Xu L,  
707 Zhou Y, Fan X, Guo C. Quercetin prevents hepatic fibrosis by inhibiting hepatic stellate cell activation  
708 and reducing autophagy via the TGF- $\beta$ 1/Smads and PI3K/Akt pathways. *Sci Rep*. 2017;7(1):9289.
- 709 39. Krenkel O, Hundertmark J, Ritz TP, Weiskirchen R, Tacke F. Single Cell RNA Sequencing Identifies  
710 Subsets of Hepatic Stellate Cells and Myofibroblasts in Liver Fibrosis. *Cells*. 2019;8(5):503.
- 711 40. Ramachandran P, Dobie R, Wilson-Kanamori JR, Dora EF, Henderson BEP, Luu NT, Portman JR,  
712 Matchett KP, Brice M, Marwick JA, Taylor RS, Efremova M, Vento-Tormo R, Carragher NO, Kendall TJ,  
713 Fallowfield JA, Harrison EM, Mole DJ, Wigmore SJ, Newsome PN, Weston CJ, Iredale JP, Tacke F, Pollard  
714 JW, Ponting CP, Marioni JC, Teichmann SA, Henderson NC. Resolving the fibrotic niche of human liver  
715 cirrhosis at single-cell level. *Nature*. 2019;575(7783):512-8.
- 716 41. Chen Z, Wan L, Jin X, Wang W, Li D. Transforming growth factor- $\beta$  signaling confers hepatic stellate  
717 cells progenitor features after partial hepatectomy. *J Cell Physiol*. 2020;235(3):2655-67.
- 718 42. Grayson DR, Jia X, Chen Y, Sharma RP, Mitchell CP, Guidotti A, Costa E. Reelin promoter  
719 hypermethylation in schizophrenia. *Proc Natl Acad Sci U S A*. 2005;102(26):9341-6.
- 720 43. Mansy SS, Nosseir MM, Zoheiry MA, Hassanein MH, Guda MF, Othman MM, AbuTalab H. Value of  
721 reelin for assessing hepatic fibrogenesis in a group of Egyptian HCV infected patients. *Clin Chem Lab*  
722 *Med*. 2014;52(9):1319-28.
- 723 44. Koyama Y, Brenner DA. Liver inflammation and fibrosis. *J Clin Invest*. 2017;127(1):55-64.
- 724 45. Stradiot L, Verhulst S, Roosens T, Oie CI, Moya IM, Halder G, Mannaerts I, van Grunsvan LA.  
725 Functionality based method for simultaneous isolation of rodent hepatic sinusoidal cells. *Biomaterials*.  
726 2017;139:91-101.
- 727 46. Fuji H, Miller G, Nishio T, Koyama Y, Lam K, Zhang V, Loomba R, Brenner D, Kisseleva T. The role of  
728 Mesothelin signaling in Portal Fibroblasts in the pathogenesis of cholestatic liver fibrosis. *Frontiers in*  
729 *molecular biosciences*. 2021;8:790032.
- 730 47. Nishio T, Hu R, Koyama Y, Liang S, Rosenthal SB, Yamamoto G, Karin D, Baglieri J, Ma HY, Xu J, Liu  
731 X, Dhar D, Iwaisako K, Taura K, Brenner DA, Kisseleva T. Activated hepatic stellate cells and portal  
732 fibroblasts contribute to cholestatic liver fibrosis in MDR2 knockout mice. *J Hepatol*. 2019;71(3):573-  
733 85.
- 734 48. Georgiev P, Jochum W, Heinrich S, Jang JH, Nocito A, Dahm F, Clavien PA. Characterization of time-  
735 related changes after experimental bile duct ligation. *Br J Surg*. 2008;95(5):646-56.

736
